# Supplementary material for: Champacyclin, a New Cyclic Octapeptide from Streptomyces Strain C42 Isolated from the Baltic Sea
Source: PubMed Central journal article supplement (PMC3877890; doi:10.3390/md11124834), 2013-12-02

## Supplementary Information

**Table S1.** Parameter for HPLC-MS<sup>n</sup> analysis of champacyclin (**1a**) and synthetic reference peptides (**1b**, **2**).

**Table S2.** Parameter for NMR analytics of the natural product champacyclin (**1a**).

**Table S3.** NMR parameters for <sup>1</sup>H- and 2D-NMR experiments for (**1a**) measurements on a DRX 600 (Bruker, Karlsruhe, Germany) NMR spectrometer at the FMP Berlin.

**Table S4.** Parameter for HPLC-MS analysis of Partial hydrolysis of the natural product champacyclin (**1a**).

**Table S5.** Parameters for GC/MS analysis of amino acids and dipeptides.

**Table S6.** Peak areas and relative Quantification of the *N*-pentafluoropropionic 2-propyl ester derivatives of the total hydrolysate of (**1a**) as shown in Figure S13.

**Figure S1.** LC-MS analysis. (A) Total ion chromatogram (TIC). (B) Extracted ion chromatogram (EIC) of (**1a**) (*m/z* 912-914) (C) Mass spectrum for the EIC as shown in (B).

**Figure S2.** In-source-fragmentation-MS<sup>n</sup>-experiments for (**1a**). (A) SID for (**1a**) with 70 eV. MS<sup>2</sup> for the 185 Da isobaric ion fragment *y*<sub>2</sub>/*b*<sub>7</sub>*y*<sub>3</sub> with the ESI-(+)-Ion-Trap (CE 15 eV). (B) MS<sup>3</sup> on 86 Da ion with ESI-(+)-Ion-Trap (CE 20 eV) for the isobaric ions *y*<sub>2</sub>/*b*<sub>7</sub>*y*<sub>3</sub>. Formation of 69 Da Ion is indicative for an Ile-residue. (C) Possible mechanism for the subsequent MS<sup>n</sup>-fragmentation series suggesting at least one Ile at position 6 and/or 8.

**Figure S3.** HR-ESI-(+)-SID-Orbitrap-MS of (A) natural product (**1a**) with SID at 65eV (B) Head-to-tail cyclization N<sup>α</sup><sub>(L)</sub>Lys<sup>1</sup>-CO-(*AlloD*)Ile<sup>8</sup> in (**1b**) (C) Head-to-side-chain cyclization N<sup>ε</sup><sub>(L)</sub>Lys-CO-(*AlloD*)Ile<sup>8</sup> in (**2**). Note: the relative abundance for the *b*<sub>1</sub> Ion *m/z* 129 [M + H]<sup>+</sup> is dramatically decreased in (C). Thus is indicative that the natural product in A (**1a**) is head-to-tail cyclized.

**Figure S4.** <sup>1</sup>H-NMR of (**1a**) in *d*<sub>6</sub>-DMSO at 600 MHz.

**Figure S5.** <sup>1</sup>H-(PRESAT)-NMR of (**1a**) in *d*<sub>6</sub>-DMSO at 600 MHz. PRESAT was used for water suppression.

**Figure S6.** <sup>1</sup>H-<sup>13</sup>C-HMQC of (**1a**) in *d*<sub>6</sub>-DMSO at 600 MHz.

**Figure S7.** HMQC-TOCSY (spin lock 80 ms) of (**1a**) in *d*<sub>6</sub>-DMSO at 600 MHz.

**Figure S8.** <sup>1</sup>H-<sup>13</sup>C-HMBC of (**1a**) in *d*<sub>6</sub>-DMSO at 600 MHz.

**Figure S9.** <sup>1</sup>H-<sup>1</sup>H-COSY of (**1a**) in *d*<sub>6</sub>-DMSO at 600 MHz.

**Figure S10.** <sup>1</sup>H-<sup>1</sup>H-NOESY (mixing time 100 ms) of (**1a**) in *d*<sub>6</sub>-DMSO at 600 MHz.

**Figure S11.** <sup>1</sup>H-<sup>1</sup>H-TOCSY (spin lock 60 ms) data of (**1a**) in *d*<sub>6</sub>-DMSO at 600 MHz.

**Figure S12.** HPLC-ESI-(+)-MS analysis of partial hydrolysate of (**1a**) after 7 h at 110 °C with 6 M HCl. (A) EICs for dipeptides, (B) EICs for tripeptides (C) EIC for tetrapeptides. Note: Absolute stereochemistry and constitution of dipeptides was assigned by GC/MS analysis. This analysis shows the status of the hydrolysis reaction, required for subsequent derivatization and analytics. Formation of lysine-dipeptides could not be observed.

**Figure S13.** Chiral GC-MS analysis of total hydrolysate of (**1a**) on a Chirasil<sup>®</sup>-(*L*)-Val column. Amino acids were analyzed as their *N*-pentafluoropropionic 2-propyl esters and identified by their [M + H]<sup>+</sup>-Ions and their fragmentation products using positive chemical ionization (PCI) with methane as reagent gas.

**Figure S14.** Chiral GC-PCI-MS analysis on a Chirasil<sup>®</sup>-(*L*)-Val column of Xle amino acid standards as *N*-pentafluoropropionic 2-propyl esters and identified by their [M + H]<sup>+</sup>-Ions using positive chemical ionization (PCI) with methane as reagent gas.

**Figure S15.** PCI-MS spectra of *N*-trifluoroacetyl-(*L*)Ile-(*D*)Ala-methyl ester found in partial hydrolysate of (1a) at  $R_t = 19.97$  min on a Chirasil<sup>®</sup>-(*L*)-Val column.

**Figure S16.** EI-MS spectra of *N*-trifluoroacetyl-(*L*)Ile-(*D*)Ala-methyl ester found in partial hydrolysate of (1a) at  $R_t = 19.97$  min on a Chirasil<sup>®</sup>-(*L*)-Val column.

**Figure S17.** PCI-MS spectra of *N*-trifluoroacetyl-(*L*)Ile-(*L*)Ile-methyl ester found in partial hydrolysate of (1a) at  $R_t = 22.5$  min on a Chirasil<sup>®</sup>-(*L*)-Val column.

**Figure S18.** EI-MS spectra of *N*-trifluoroacetyl-(*L*)Ile-(*L*)Ile-methyl ester found in partial hydrolysate of (1a) at  $R_t = 22.5$  min on a Chirasil<sup>®</sup>-(*L*)-Val column.

**Figure S19.** PCI-MS spectra of *N*-trifluoroacetyl-(*D*)Leu-(*L*)Ile-methyl ester found in partial hydrolysate of (1a) at  $R_t = 24.6$  min on a Chirasil<sup>®</sup>-(*L*)-Val column.

**Figure S20.** EI-MS spectra of *N*-trifluoroacetyl-(*D*)Leu-(*L*)Ile-methyl ester found in partial hydrolysate of (1a) at  $R_t = 24.6$  min on a Chirasil<sup>®</sup>-(*L*)-Val column.

**Figure S21.** PCI-MS spectra of *N*-trifluoroacetyl-(*L*)Ile-(*D*)Phe-methyl ester found in partial hydrolysate of (1a) at  $R_t = 46.68$  min on a Chirasil<sup>®</sup>-(*L*)-Val column.

**Figure S22.** EI-MS spectra of *N*-trifluoroacetyl-(*L*)Ile-(*D*)Phe-methyl ester found in partial hydrolysate of (1a) at  $R_t = 46.68$  min on a Chirasil<sup>®</sup>-(*L*)-Val column.

**Figure S23.** PCI-MS spectra of synthetic *N*-trifluoroacetyl-Leu-Leu-methyl ester.

**Figure S24.** EI-MS spectra of synthetic *N*-trifluoroacetyl-Leu-Leu-methyl ester.

**Figure S25.** PCI-MS spectra of synthetic *N*-trifluoroacetyl-Ile-Ile-methyl ester.

**Figure S26.** EI-MS spectra of synthetic *N*-trifluoroacetyl-Ile-Ile-methyl ester.

**Figure S27.** PCI-MS spectra of synthetic *N*-trifluoroacetyl-Leu-Ile-methyl ester.

**Figure S28.** EI-MS spectra of synthetic *N*-trifluoroacetyl-Leu-Ile-methyl ester.

**Figure S29.** PCI-MS spectra of synthetic *N*-trifluoroacetyl-Ile-Leu-methyl ester.

**Figure S30.** EI-MS spectra of synthetic *N*-trifluoroacetyl-Ile-Leu-methyl ester.

**Figure S31.** PCI-MS spectra of synthetic *N*-trifluoroacetyl-Ala-Leu-methyl ester.

**Figure S32.** EI-MS spectra of synthetic *N*-trifluoroacetyl-Ala-Leu-methyl ester.

**Figure S33.** PCI-MS spectra of synthetic *N*-trifluoroacetyl-Leu-Ala-methyl ester.

**Figure S34.** EI-MS spectra of synthetic *N*-trifluoroacetyl-Leu-Ala-methyl ester.

**Figure S35.** PCI-MS spectra of synthetic *N*-trifluoroacetyl-Ala-Ile-methyl ester.

**Figure S36.** EI-MS spectra of synthetic *N*-trifluoroacetyl-Ala-Ile-methyl ester.

**Figure S37.** PCI-MS spectra of synthetic *N*-trifluoroacetyl-Ile-Ala-methyl ester.

**Figure S38.** EI-MS spectra of synthetic *N*-trifluoroacetyl-Ile-Ala-methyl ester.

**Figure S39.** PCI-MS spectra of synthetic *N*-trifluoroacetyl-Leu-Phe-methyl ester.

**Figure S40.** EI-MS spectra of synthetic *N*-trifluoroacetyl-Leu-Phe-methyl ester.

**Figure S41.** PCI-MS spectra of synthetic *N*-trifluoroacetyl-Phe-Leu-methyl ester.

**Figure S42.** EI-MS spectra of synthetic *N*-trifluoroacetyl-Phe-Leu-methyl ester.

**Figure S43.** PCI-MS spectra of synthetic *N*-trifluoroacetyl-Ile-Phe-methyl ester.

**Figure S44.** EI-MS spectra of synthetic *N*-trifluoroacetyl-Ile-Phe-methyl ester.

**Figure S45.** PCI-MS spectra of synthetic *N*-trifluoroacetyl-Phe-Ile-methyl ester.

**Figure S46.** EI-MS spectra of synthetic *N*-trifluoroacetyl-Phe-Ile-methyl ester.

**Table S1.** Parameter for HPLC-MS<sup>n</sup> analysis of champacyclin (**1a**) and synthetic reference peptides (**1b**, **2**).

| Parameter for HPLC-MS <sup>n</sup> Analysis |                                                                                |           |  |
|---------------------------------------------|--------------------------------------------------------------------------------|-----------|--|
| Mass Spectrometer                           | LTQ Orbitrap XL Mass Spectrometer (Thermo Fisher Scientific, Waltham, MA, USA) |           |  |
| HPLC                                        | 1260 HPLC-system (Agilent, Santa Clara, CA, USA)                               |           |  |
| Column                                      | Thermo, Waltham, MA, USA, Hypersil-Gold, 5 $\mu$ m, 50 $\times$ 2.1 mm         |           |  |
| Solvent System                              | A: H <sub>2</sub> O + 0.1% HCOOH<br>B: ACN + 0.1% HCOOH                        |           |  |
| Flow Rate                                   | 0.25 mL/min                                                                    |           |  |
| Gradient                                    | B%                                                                             | Time      |  |
|                                             | 5% B                                                                           | 0 min     |  |
|                                             | 5% B                                                                           | 1 min     |  |
|                                             | 100% B                                                                         | 6 min     |  |
|                                             | 100% B                                                                         | 10 min    |  |
|                                             | 5% B                                                                           | 10.10 min |  |
|                                             | 5% B                                                                           | 13 min    |  |

**Table S2.** Parameter for NMR analytics of the natural product champacyclin (**1a**).

| Parameter for the NMR Analytics |                                                            |
|---------------------------------|------------------------------------------------------------|
| NMR-Spectrometer                | DRX 600 MHz ( <sup>1</sup> H) (Bruker, Karlsruhe, Germany) |
| Solvent                         | <i>d</i> <sub>6</sub> -DMSO, 500 $\mu$ L                   |
| Probe Head                      | TXI 5 mm, with Z-Gradient                                  |

**Table S3.** NMR parameters for <sup>1</sup>H- and 2D-NMR experiments for (**1a**) measurements on a DRX 600 (Bruker, Karlsruhe, Germany) NMR spectrometer at the FMP Berlin.

| Experiment                           | Pulse Program | Scans | TD (F1/F2) | Additional Information |
|--------------------------------------|---------------|-------|------------|------------------------|
| <sup>1</sup> H-NMR                   | zg30          | 64    | 65536      | /                      |
| <sup>1</sup> H-NMR-PRESAT            | MF1hpresat    | 32    | 8192       | /                      |
| <sup>1</sup> H- <sup>1</sup> H-COSY  | MFdqfcosypre  | 8     | 4096/1024  | /                      |
| <sup>1</sup> H- <sup>1</sup> H-NOESY | MFnoesypre    | 32    | 4096/1024  | 100 ms                 |
| <sup>1</sup> H- <sup>1</sup> H-TOCSY | Psdipsi2pre   | 8     | 4096/1024  | 60 ms                  |
| <sup>1</sup> H- <sup>13</sup> C-HMQC | MFbihmqceaf2  | 128   | 1024/512   | /                      |
| <sup>1</sup> H- <sup>13</sup> C-HMBC | MFhmbceaf2    | 80    | 4096/1024  | /                      |
| HSQC-TOCSY                           | MFbihmqctocf2 | 8     | 1024/512   | 80 ms                  |

**Table S4.** Parameter for HPLC-MS analysis of Partial hydrolysis of the natural product champacyclin (**1a**).

| Parameter for HPLC-MS Analysis |                                                                                                                                                                                                                                                                                                                                                                                                                                                |    |      |      |       |      |       |       |        |       |       |        |         |        |       |      |         |      |        |
|--------------------------------|------------------------------------------------------------------------------------------------------------------------------------------------------------------------------------------------------------------------------------------------------------------------------------------------------------------------------------------------------------------------------------------------------------------------------------------------|----|------|------|-------|------|-------|-------|--------|-------|-------|--------|---------|--------|-------|------|---------|------|--------|
| <b>Mass Spectrometer</b>       | QQQ-MS-6460 (Agilent Technologies, Waldbronn Germany)                                                                                                                                                                                                                                                                                                                                                                                          |    |      |      |       |      |       |       |        |       |       |        |         |        |       |      |         |      |        |
| <b>HPLC</b>                    | Agilent 1290 UHPLC-system (Agilent Technologies, Waldbronn, Germany)                                                                                                                                                                                                                                                                                                                                                                           |    |      |      |       |      |       |       |        |       |       |        |         |        |       |      |         |      |        |
| <b>Column</b>                  | Agilent, Waldbronn Germany, Eclipse Plus C18 RRHD column, 1.8 $\mu\text{m}$ , 2.1 $\times$ 50 mm                                                                                                                                                                                                                                                                                                                                               |    |      |      |       |      |       |       |        |       |       |        |         |        |       |      |         |      |        |
| <b>Solvent System</b>          | A: H <sub>2</sub> O + 0.1% HCOOH<br>B: ACN + 0.1% HCOOH                                                                                                                                                                                                                                                                                                                                                                                        |    |      |      |       |      |       |       |        |       |       |        |         |        |       |      |         |      |        |
| <b>Flow Rate</b>               | 0.3 mL/min                                                                                                                                                                                                                                                                                                                                                                                                                                     |    |      |      |       |      |       |       |        |       |       |        |         |        |       |      |         |      |        |
| <b>Gradient</b>                | <table border="1"> <thead> <tr> <th>B%</th> <th>Time</th> </tr> </thead> <tbody> <tr> <td>5% B</td> <td>0 min</td> </tr> <tr> <td>5% B</td> <td>1 min</td> </tr> <tr> <td>20% B</td> <td>20 min</td> </tr> <tr> <td>70% B</td> <td>6 min</td> </tr> <tr> <td>100% B</td> <td>6.5 min</td> </tr> <tr> <td>100% B</td> <td>8 min</td> </tr> <tr> <td>5% B</td> <td>8.5 min</td> </tr> <tr> <td>5% B</td> <td>10 min</td> </tr> </tbody> </table> | B% | Time | 5% B | 0 min | 5% B | 1 min | 20% B | 20 min | 70% B | 6 min | 100% B | 6.5 min | 100% B | 8 min | 5% B | 8.5 min | 5% B | 10 min |
| B%                             | Time                                                                                                                                                                                                                                                                                                                                                                                                                                           |    |      |      |       |      |       |       |        |       |       |        |         |        |       |      |         |      |        |
| 5% B                           | 0 min                                                                                                                                                                                                                                                                                                                                                                                                                                          |    |      |      |       |      |       |       |        |       |       |        |         |        |       |      |         |      |        |
| 5% B                           | 1 min                                                                                                                                                                                                                                                                                                                                                                                                                                          |    |      |      |       |      |       |       |        |       |       |        |         |        |       |      |         |      |        |
| 20% B                          | 20 min                                                                                                                                                                                                                                                                                                                                                                                                                                         |    |      |      |       |      |       |       |        |       |       |        |         |        |       |      |         |      |        |
| 70% B                          | 6 min                                                                                                                                                                                                                                                                                                                                                                                                                                          |    |      |      |       |      |       |       |        |       |       |        |         |        |       |      |         |      |        |
| 100% B                         | 6.5 min                                                                                                                                                                                                                                                                                                                                                                                                                                        |    |      |      |       |      |       |       |        |       |       |        |         |        |       |      |         |      |        |
| 100% B                         | 8 min                                                                                                                                                                                                                                                                                                                                                                                                                                          |    |      |      |       |      |       |       |        |       |       |        |         |        |       |      |         |      |        |
| 5% B                           | 8.5 min                                                                                                                                                                                                                                                                                                                                                                                                                                        |    |      |      |       |      |       |       |        |       |       |        |         |        |       |      |         |      |        |
| 5% B                           | 10 min                                                                                                                                                                                                                                                                                                                                                                                                                                         |    |      |      |       |      |       |       |        |       |       |        |         |        |       |      |         |      |        |

**Table S5.** Parameters for GC/MS analysis of amino acids and dipeptides.

| Parameters for GC/MS Analysis                                                    |                                                                                                                                                                                                                                                                           |
|----------------------------------------------------------------------------------|---------------------------------------------------------------------------------------------------------------------------------------------------------------------------------------------------------------------------------------------------------------------------|
| GC Column                                                                        | Chirasil <sup>®</sup> -(L)-Val (Agilent CP7495, Waldbronn Germany), 200 $^{\circ}\text{C}$ , 25 m, 250 $\mu\text{m}$ $\times$ 0.12 $\mu\text{m}$                                                                                                                          |
| Temperature Program<br><i>N</i> -trifluoroacetyl methyl ester:dipeptides         | 140 $^{\circ}\text{C}$ (10 min isothermal), 190 $^{\circ}\text{C}$ , 5 $^{\circ}\text{C}/\text{min}$ (33min isothermal), 195 $^{\circ}\text{C}$ , 5 $^{\circ}\text{C}/\text{min}$ (20 min isothermal)                                                                     |
| Temperature Program<br><i>N</i> -pentafluoropropionic 2-propyl ester:amino acids | 70 $^{\circ}\text{C}$ (5 min isothermal), 100 $^{\circ}\text{C}$ , 2 $^{\circ}\text{C}/\text{min}$ , 190 $^{\circ}\text{C}$ , 3.5 $^{\circ}\text{C}/\text{min}$ (10 min isothermal)                                                                                       |
| Gas Chromatograph                                                                | GC/MS 5975C (Agilent Technologies, Waldbronn, Germany)                                                                                                                                                                                                                    |
| Mass Spectrometer (GC-MS)                                                        |                                                                                                                                                                                                                                                                           |
| Scan                                                                             | Full-Scan, 50–800 $m/z$                                                                                                                                                                                                                                                   |
| Heater/MSD-Transfer Line                                                         | 300 $^{\circ}\text{C}/280$ $^{\circ}\text{C}$                                                                                                                                                                                                                             |
| Flow                                                                             | 1.2 mL/min, 40.3 cm/s with He as carrier gas                                                                                                                                                                                                                              |
| PCI-Mode                                                                         | Energy: 105.2 eV, Emission: 182 $\mu\text{A}$ ,<br>MS-Source: 300 $^{\circ}\text{C}$ , MS Quad: 150 $^{\circ}\text{C}$<br>Collision gas: Methane with flow rate 19%                                                                                                       |
| EI-Mode using CI-Source                                                          | Energy: 105.2 eV, Emission: 250 $\mu\text{A}$ ,<br>MS-Source: 300 $^{\circ}\text{C}$ , MS Quad: 150 $^{\circ}\text{C}$<br>Collision gas: Methane with flow rate 0%                                                                                                        |
| Single Ion Monitoring<br>(SIM)<br>for Higher Sensitivity                         | SIM was used with ions represented in all<br><i>N</i> -trifluoroacetyl methyl ester dipeptide derivatives<br>#1: $m/z$ 389 [M + H] <sup>+</sup> (Phe-Xle/Xle-Phe)<br>#2: $m/z$ 313 [M + H] <sup>+</sup> (Ala-Xle/Xle-Ala)<br>#3: $m/z$ 355 [M + H] <sup>+</sup> (Xle-Xle) |

**Table S6.** Peak areas and relative Quantification of the *N*-pentafluoropropionic 2-propyl ester derivatives of the total hydrolysate of (**1a**) as shown in Figure S13.

| Amino Acids<br>( <i>N</i> -Pentafluoropropionic<br>2-Propyl Ester Derivatives) | Peak Areas (Absolute)<br>RTE Integrator | Ratio/Racemization Factor (%) |
|--------------------------------------------------------------------------------|-----------------------------------------|-------------------------------|
| ( <i>D</i> )Ala:( <i>L</i> )Ala                                                | 64,586,729: <i>n.d.</i>                 | <i>n.d.</i>                   |
| (Allo <i>D</i> )Ile:( <i>L</i> )Ile                                            | 40,548,258:114,743,611                  | 1:2.8                         |
| ( <i>D</i> )Leu:( <i>L</i> )Leu                                                | 92,808,033:5,641,417                    | 93.9%:6.1%                    |
| ( <i>D</i> )Phe:( <i>L</i> )Phe                                                | 97,483,637:3,178,567                    | 96.8%:3.2%                    |
| ( <i>D</i> )Lys:( <i>L</i> )Lys                                                | 3,493,779:69,688,561                    | 95%:5.0%                      |

*n.d.* = not determined.**Figure S1.** LC-MS analysis. (A) Total ion chromatogram (TIC). (B) Extracted ion chromatogram (EIC) of (**1a**) (*m/z* 912-914) (C) Mass spectrum for the EIC as shown in (B).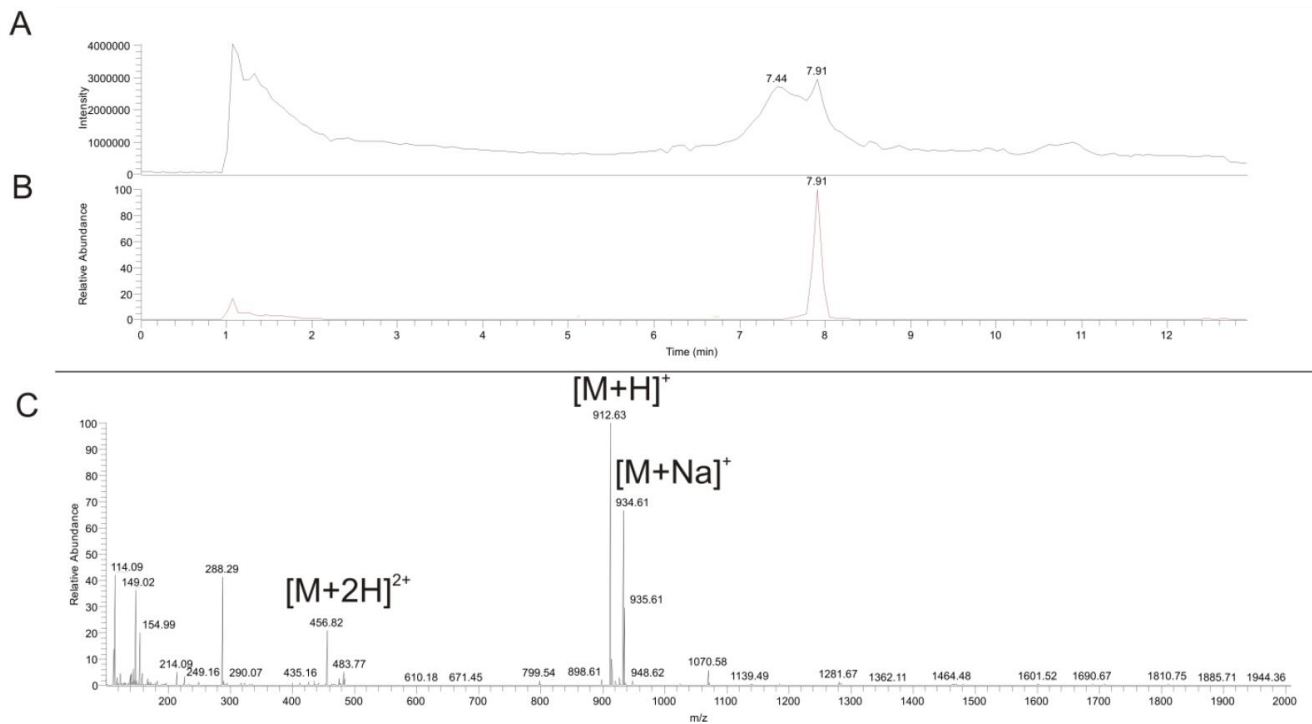

**Figure S2.** In-source-fragmentation- $MS^n$ -experiments for (1a). (A) SID for (1a) with 70 eV.  $MS^2$  for the 185 Da isobaric ion fragment  $y_2/b_7y_3$  with the ESI-(+)-Ion-Trap (CE 15 eV). (B)  $MS^3$  on 86 Da ion with ESI-(+)-Ion-Trap (CE 20 eV) for the isobaric ions  $y_2/b_7y_3$ . Formation of 69 Da Ion is indicative for an Ile-residue. (C) Possible mechanism for the subsequent  $MS^n$ -fragmentation series suggesting at least one Ile at position 6 and/or 8.

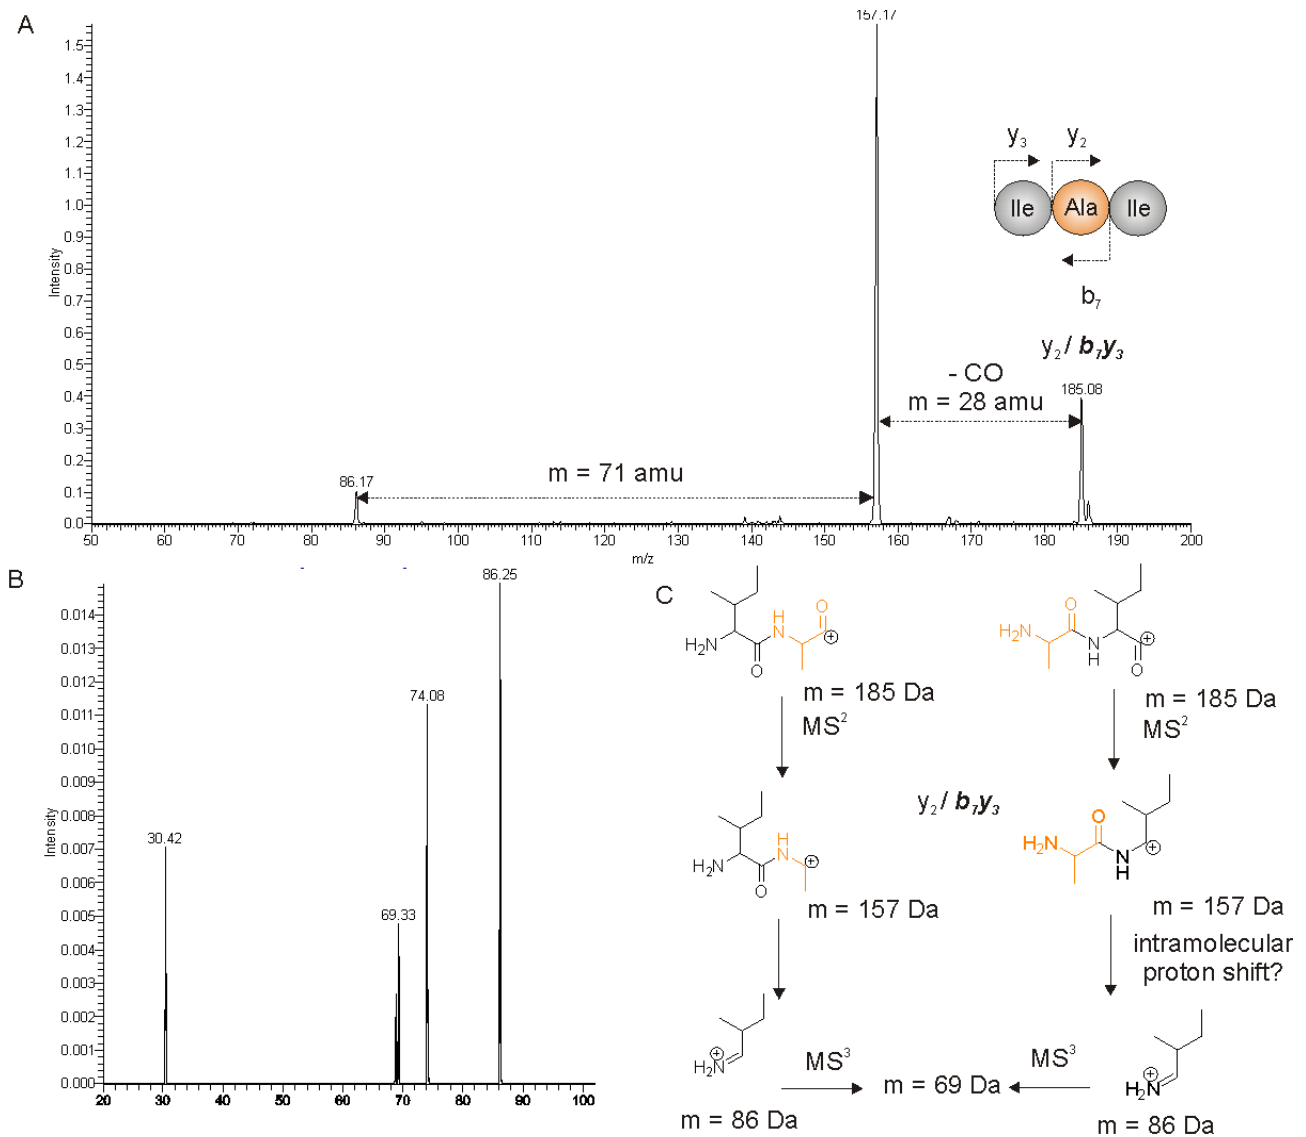

**Figure S3.** HR-ESI(+)-SID-Orbitrap-MS of (A) natural product (**1a**) with SID at 65eV (B) Head-to-tail cyclization  $N^{\alpha}_{(L)}\text{Lys}^1\text{-CO}_{-(AlloD)}\text{Ile}^8$  in (**1b**) (C) Head-to-side-chain cyclization  $N^{\zeta}_{-(L)}\text{Lys-CO}_{-(AlloD)}\text{Ile}^8$  in (**2**). Note: the relative abundance for the  $b_1$  Ion  $m/z$  129  $[\text{M} + \text{H}]^+$  is dramatically decreased in (C). Thus is indicative that the natural product in A (**1a**) is head-to-tail cyclized.

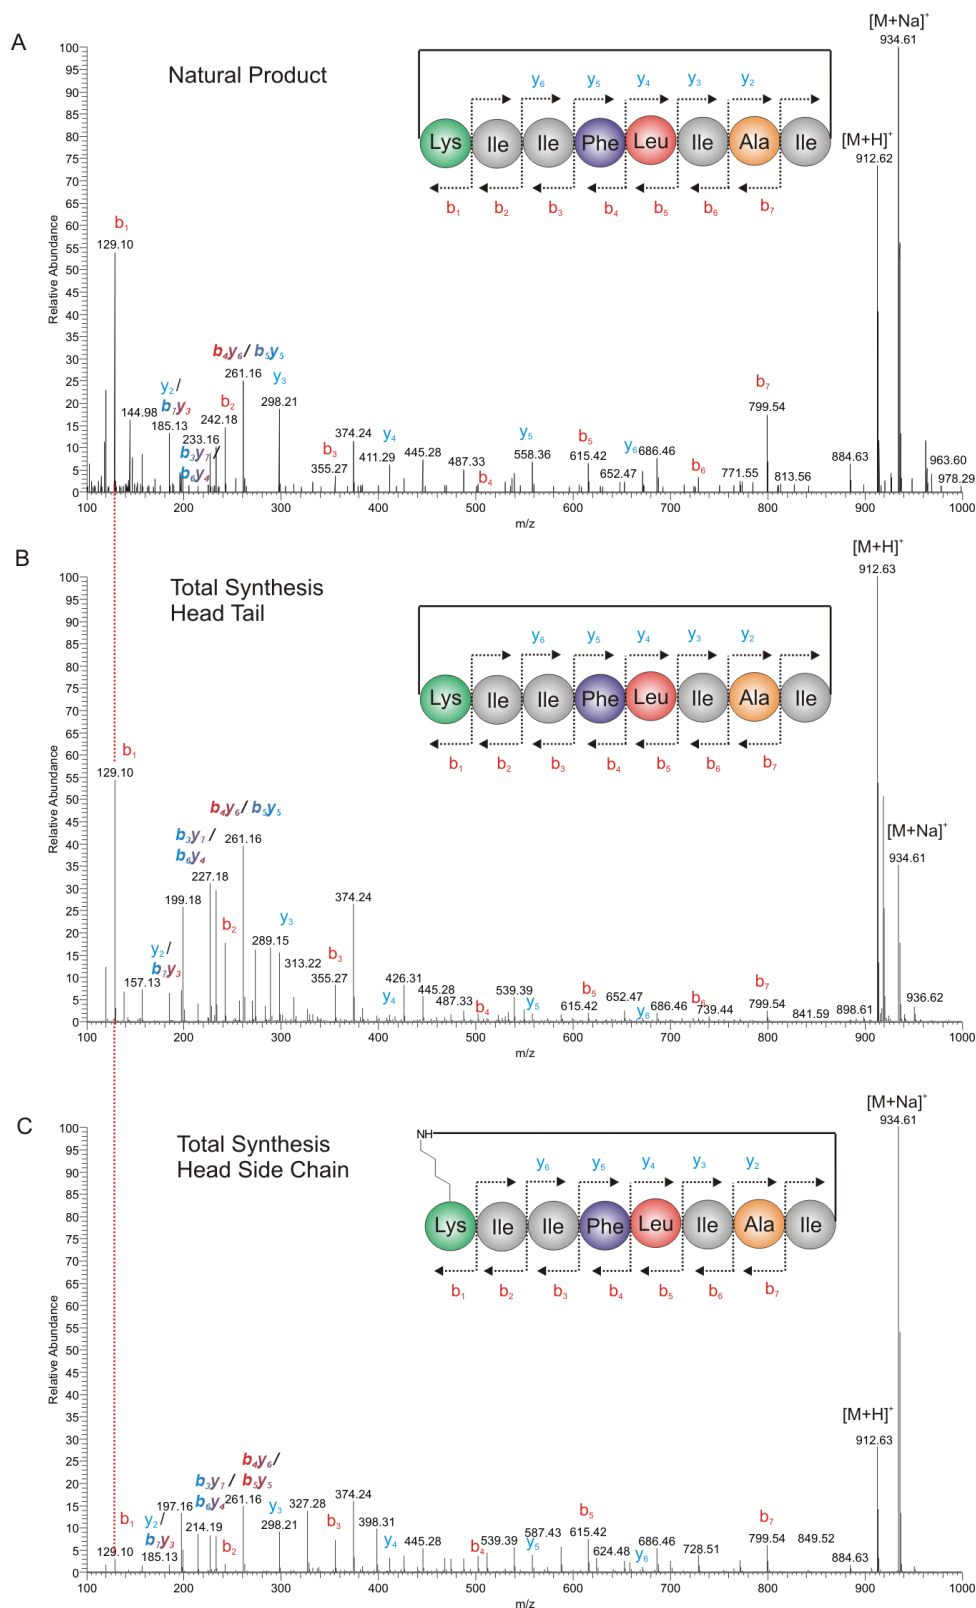

**Figure S4.**  $^1\text{H}$ -NMR of (**1a**) in  $d_6$ -DMSO at 600 MHz.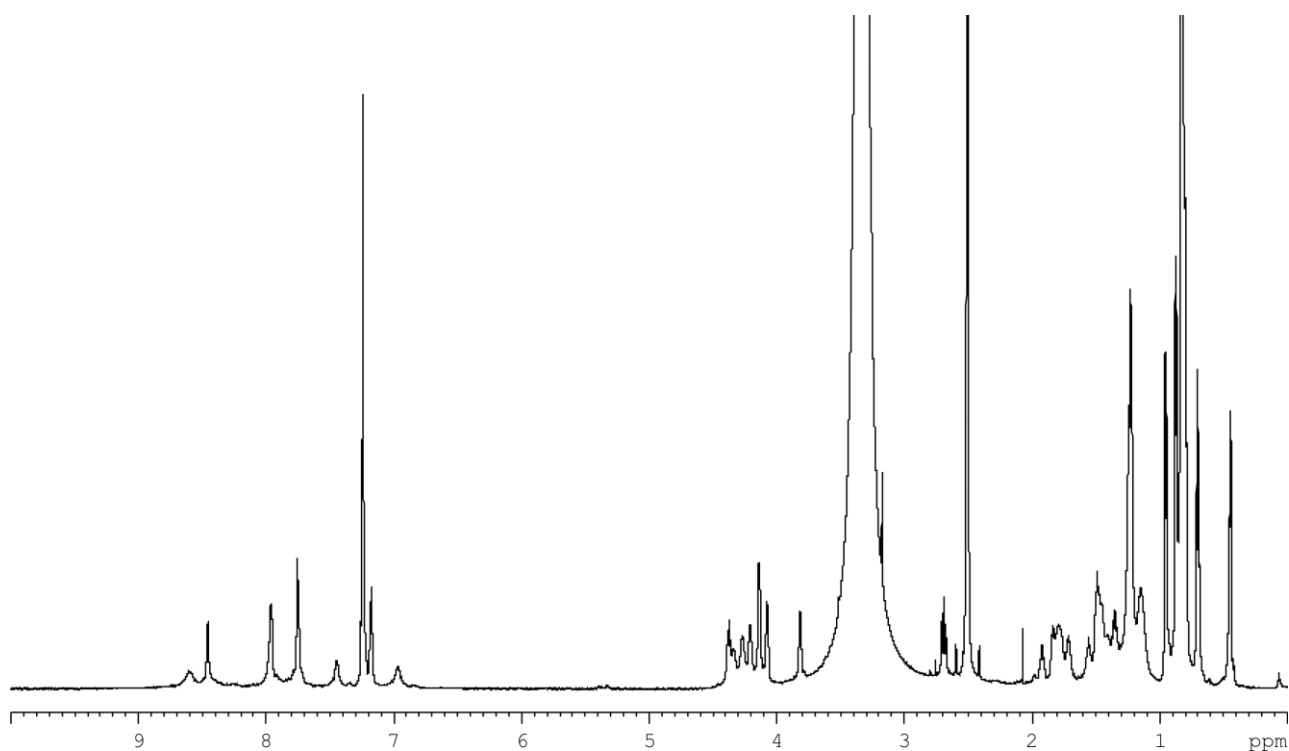**Figure S5.**  $^1\text{H}$ -(PRESAT)-NMR of (**1a**) in  $d_6$ -DMSO at 600 MHz. PRESAT was used for water suppression.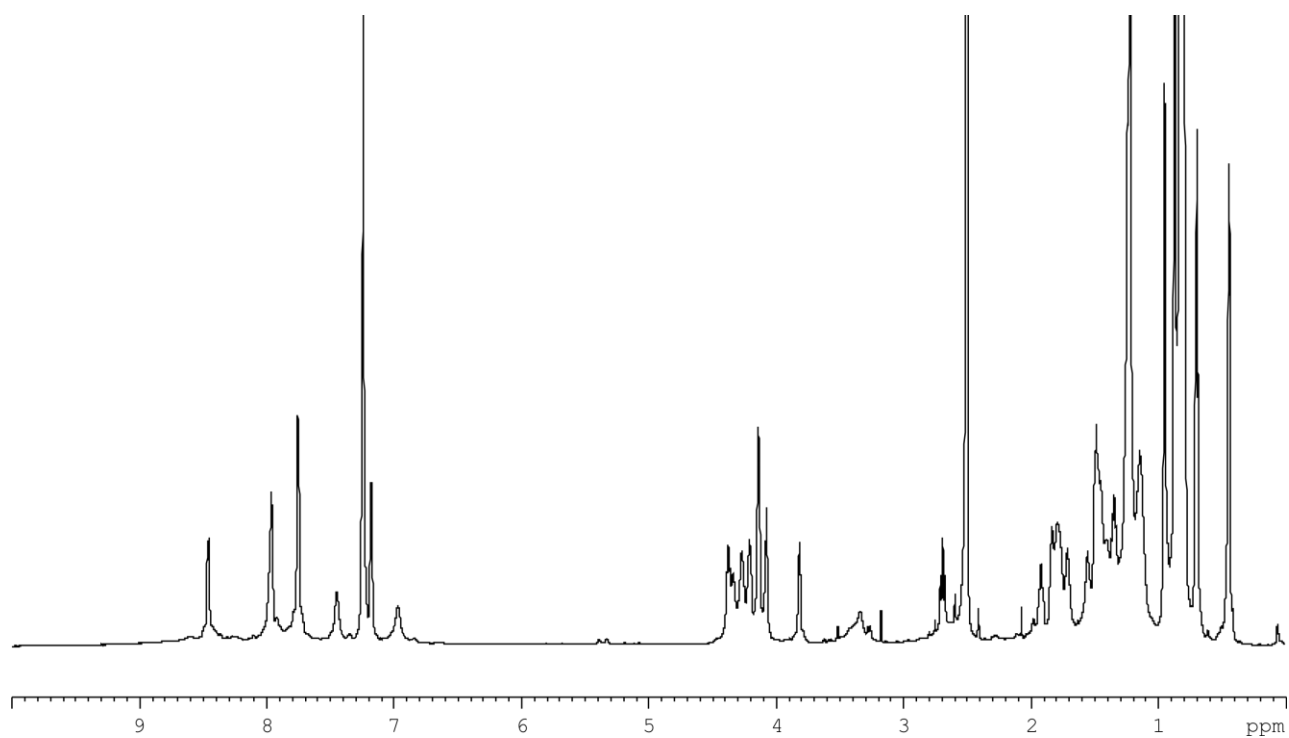



**Figure S6.**  $^1\text{H}$ - $^{13}\text{C}$ -HMQC of (1a) in  $d_6$ -DMSO at 600 MHz.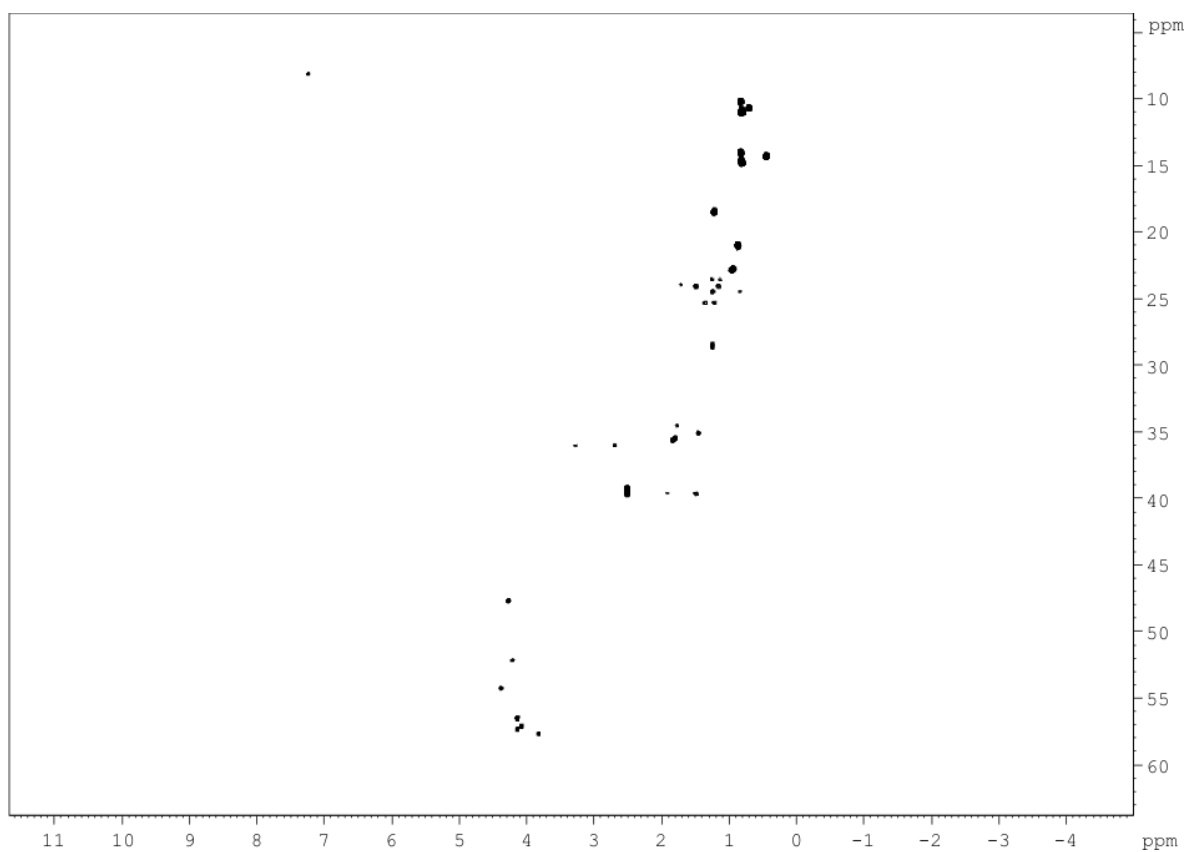**Figure S7.** HMQC-TOCSY (spin lock 80 ms) of (1a) in  $d_6$ -DMSO at 600 MHz.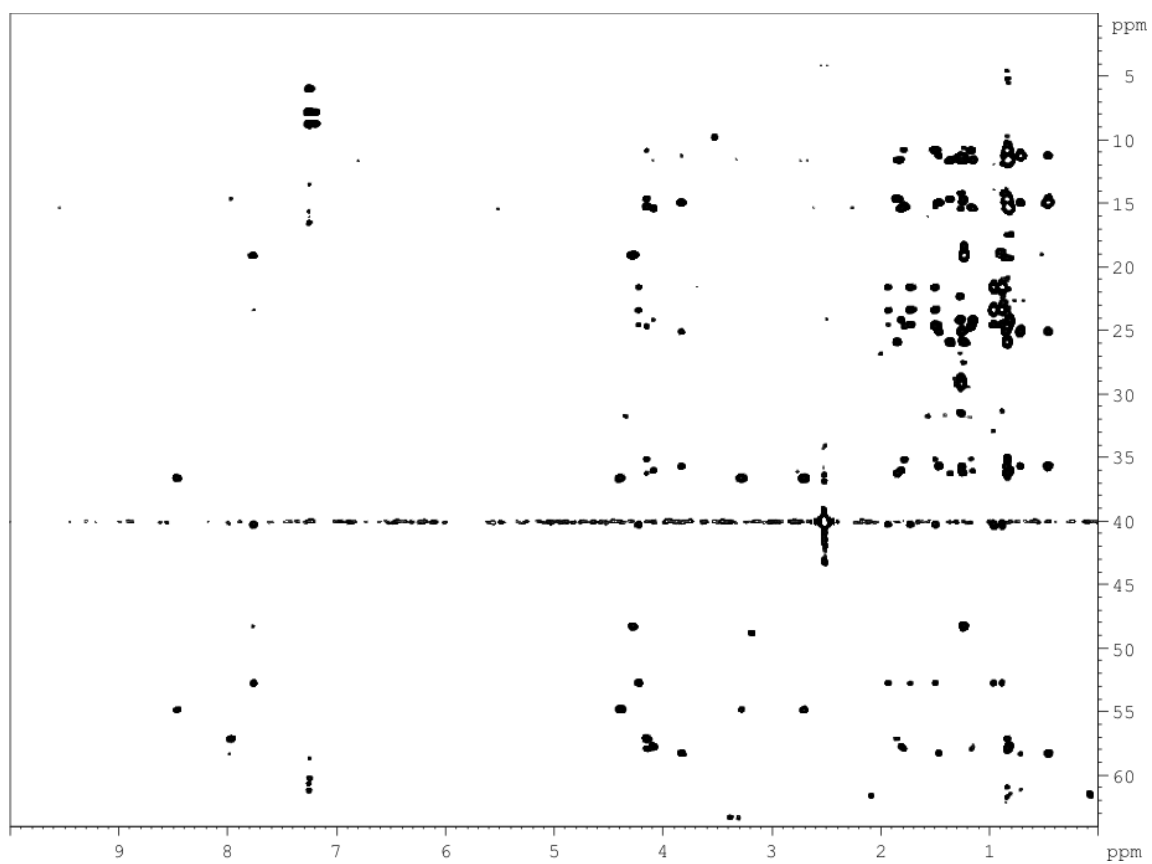

**Figure S8.**  $^1\text{H}$ - $^{13}\text{C}$ -HMBC of (1a) in  $d_6$ -DMSO at 600 MHz.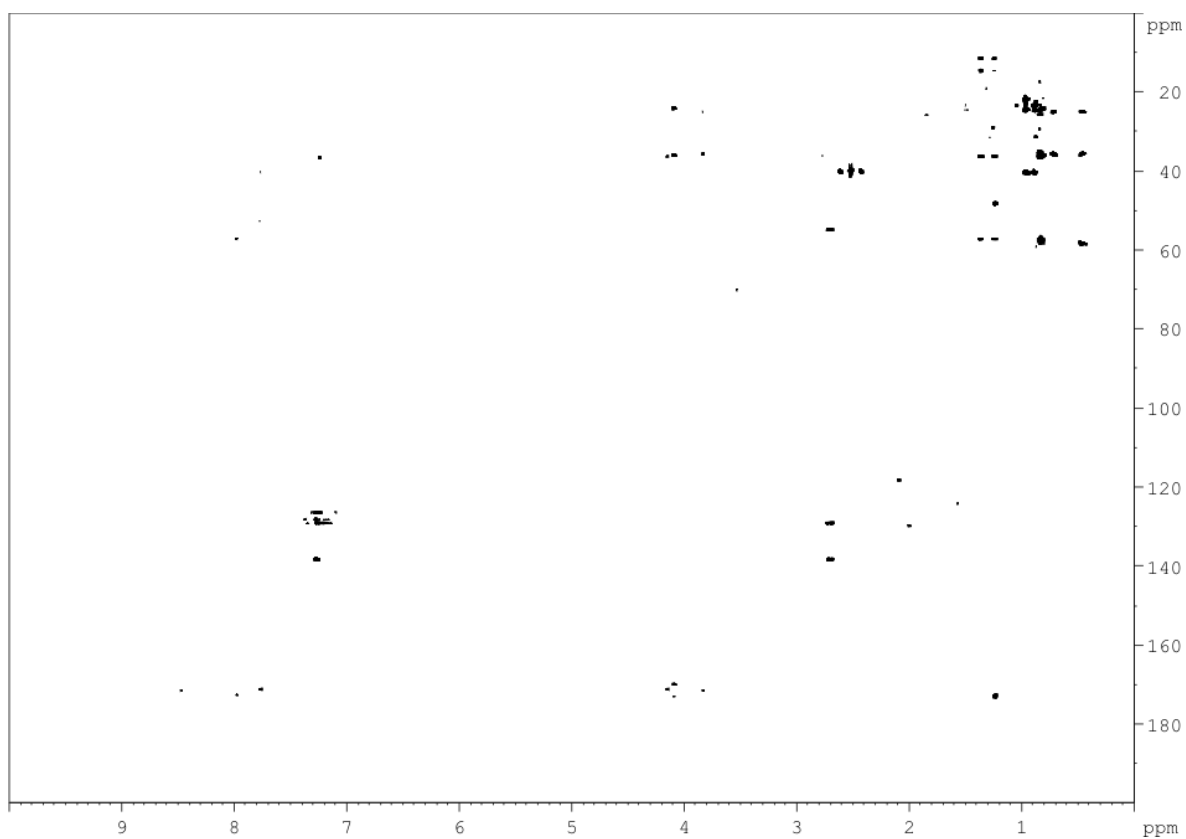**Figure S9.**  $^1\text{H}$ - $^1\text{H}$ -COSY of (1a) in  $d_6$ -DMSO at 600 MHz.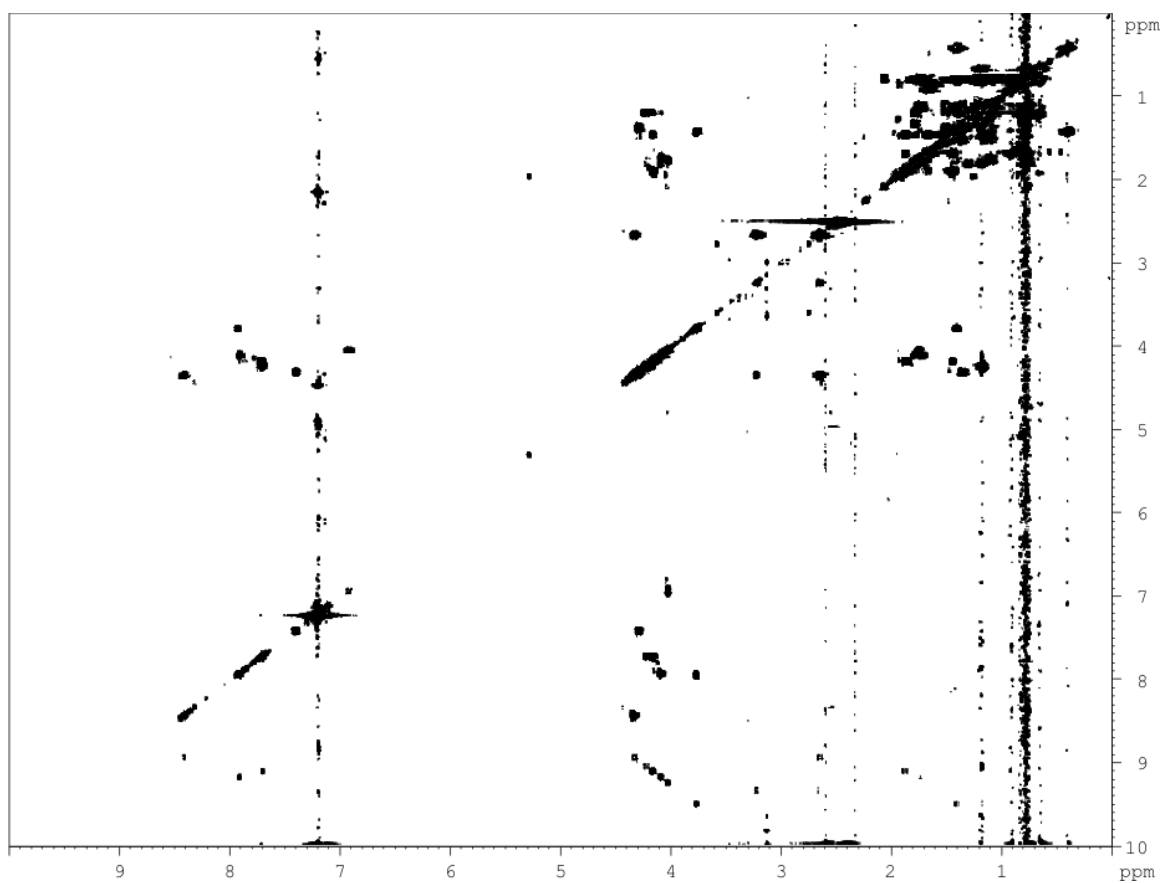

**Figure S10.**  $^1\text{H}$ - $^1\text{H}$ -NOESY (mixing time 100 ms) of (**1a**) in  $d_6$ -DMSO at 600 MHz.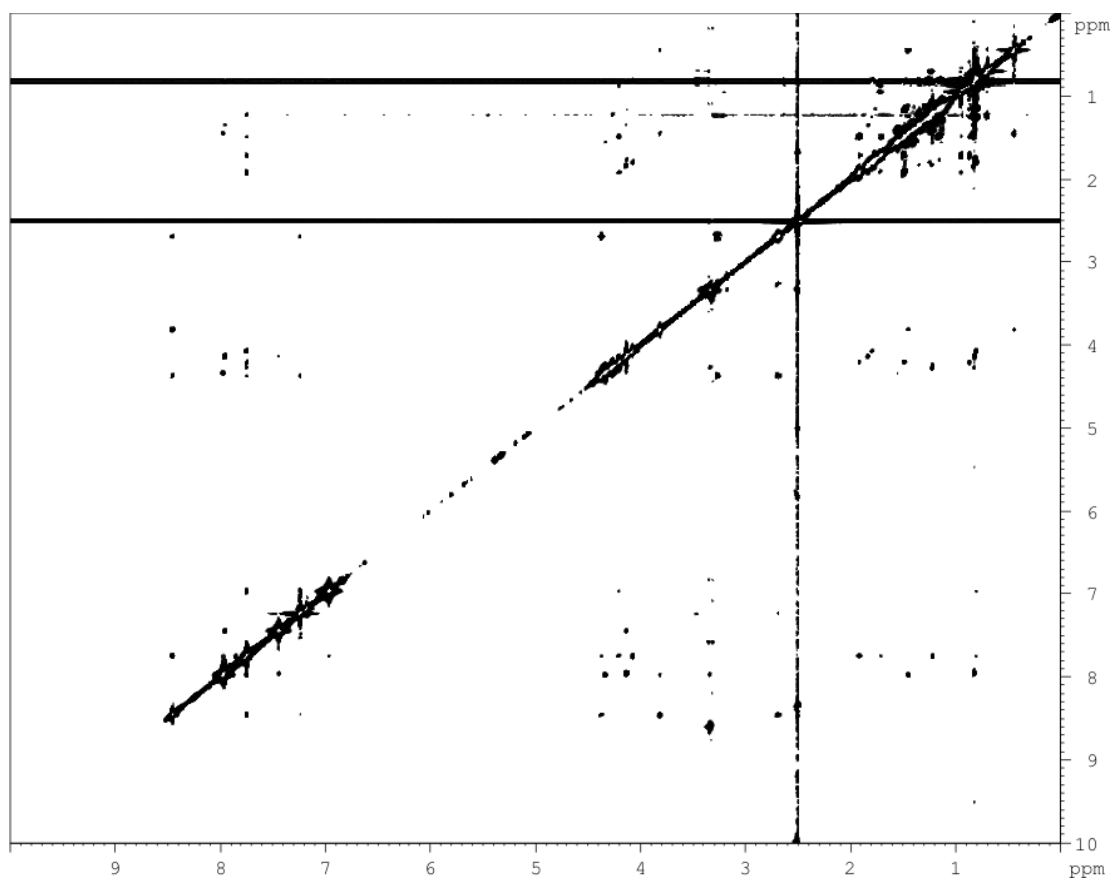**Figure S11.**  $^1\text{H}$ - $^1\text{H}$ -TOCSY (spin lock 60 ms) data of (**1a**) in  $d_6$ -DMSO at 600 MHz.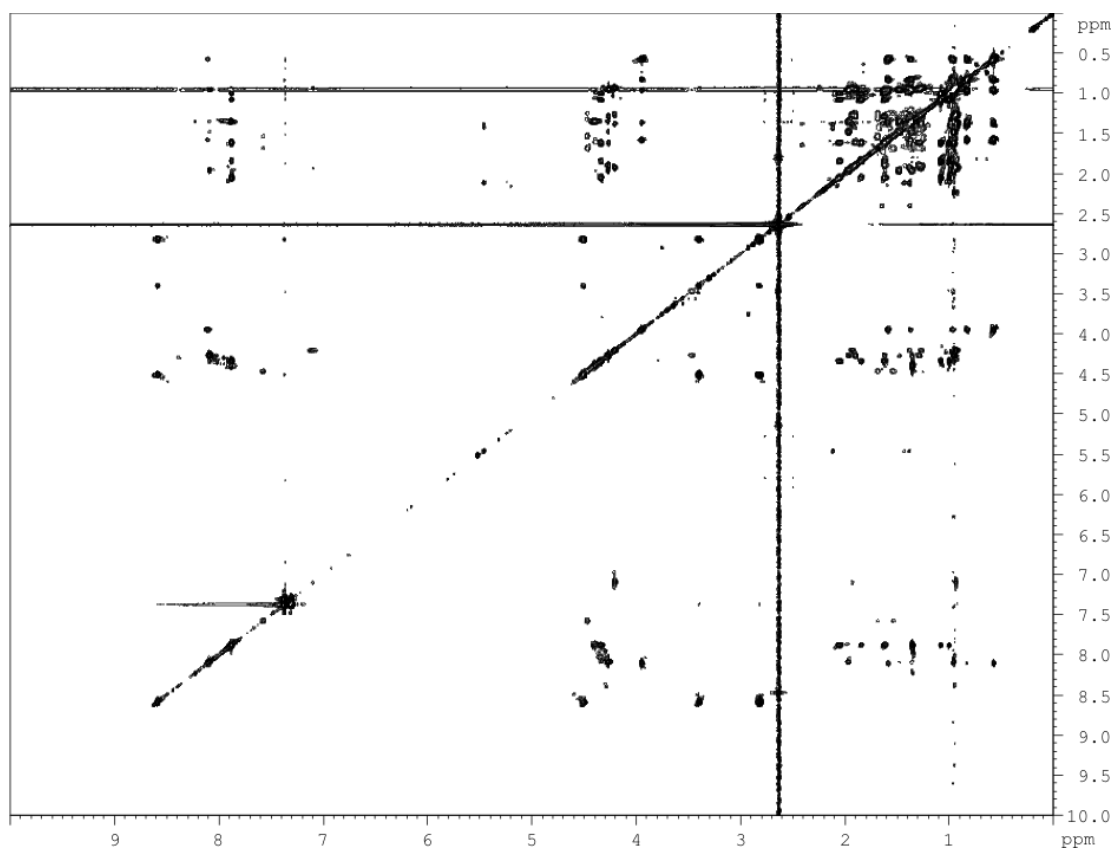

**Figure S12.** HPLC-ESI-(+)-MS analysis of partial hydrolysate of (**1a**) after 7 h at 110 °C with 6 M HCl. (A) EICs for dipeptides, (B) EICs for tripeptides (C) EIC for tetrapeptides. Note: Absolute stereochemistry and constitution of dipeptides was assigned by GC/MS analysis. This analysis shows the status of the hydrolysis reaction, required for subsequent derivatization and analytics. Formation of lysine-dipeptides could not be observed.

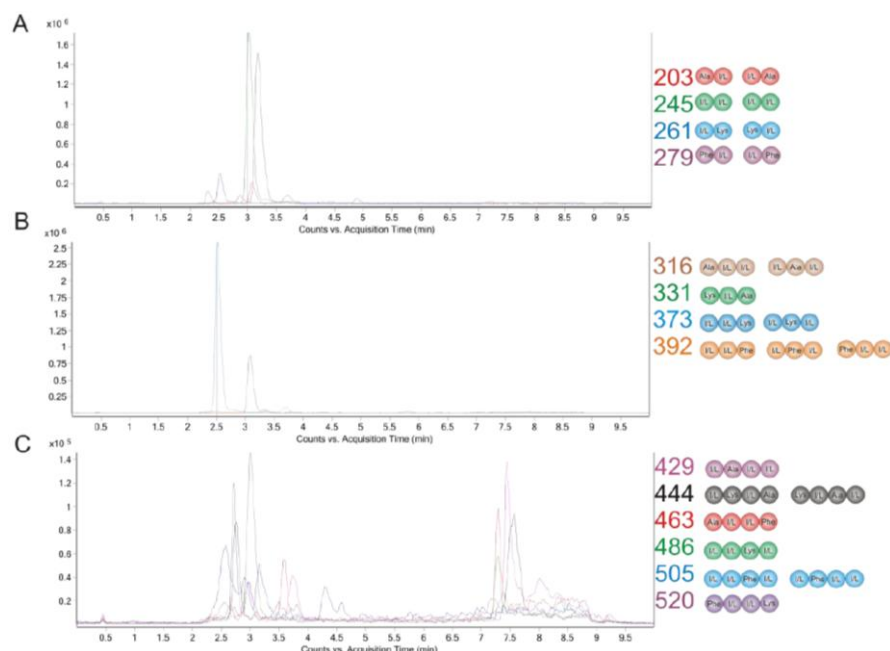

**Figure S13.** Chiral GC-MS analysis of total hydrolysate of (**1a**) on a Chirasil<sup>®</sup>-(L)-Val column. Amino acids were analyzed as their *N*-pentafluoropropionic 2-propyl esters and identified by their  $[M + H]^+$ -Ions and their fragmentation products using positive chemical ionization (PCI) with methane as reagent gas.

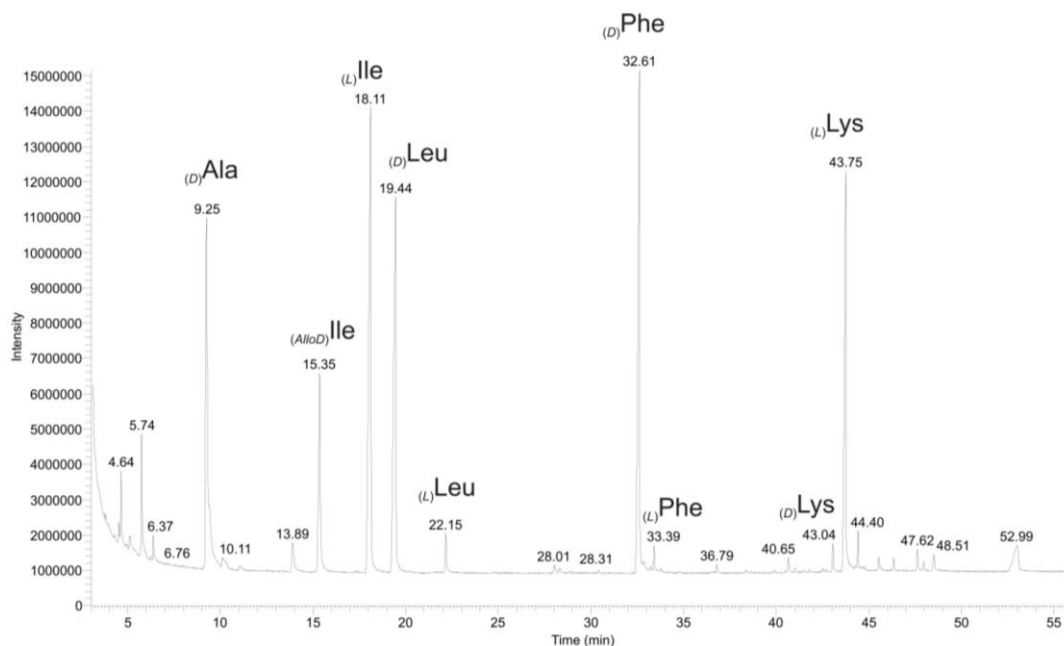

**Figure S14.** Chiral GC-PCI-MS analysis on a Chirasil<sup>®</sup>-(L)-Val column of Xle amino acid standards as *N*-pentafluoropropionic 2-propyl esters and identified by their  $[M + H]^+$ -Ions using positive chemical ionization (PCI) with methane as reagent gas.

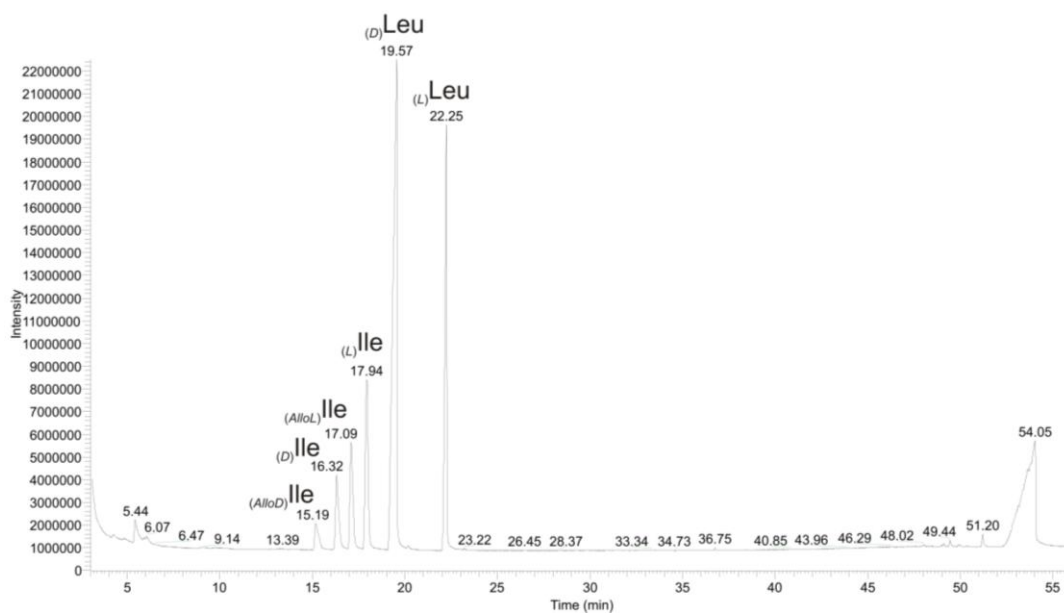

**Figure S15.** PCI-MS spectra of *N*-trifluoroacetyl-(L)Ile-(D)Ala-methyl ester found in partial hydrolysate of (1a) at  $R_t = 19.97$  min on a Chirasil<sup>®</sup>-(L)-Val column.

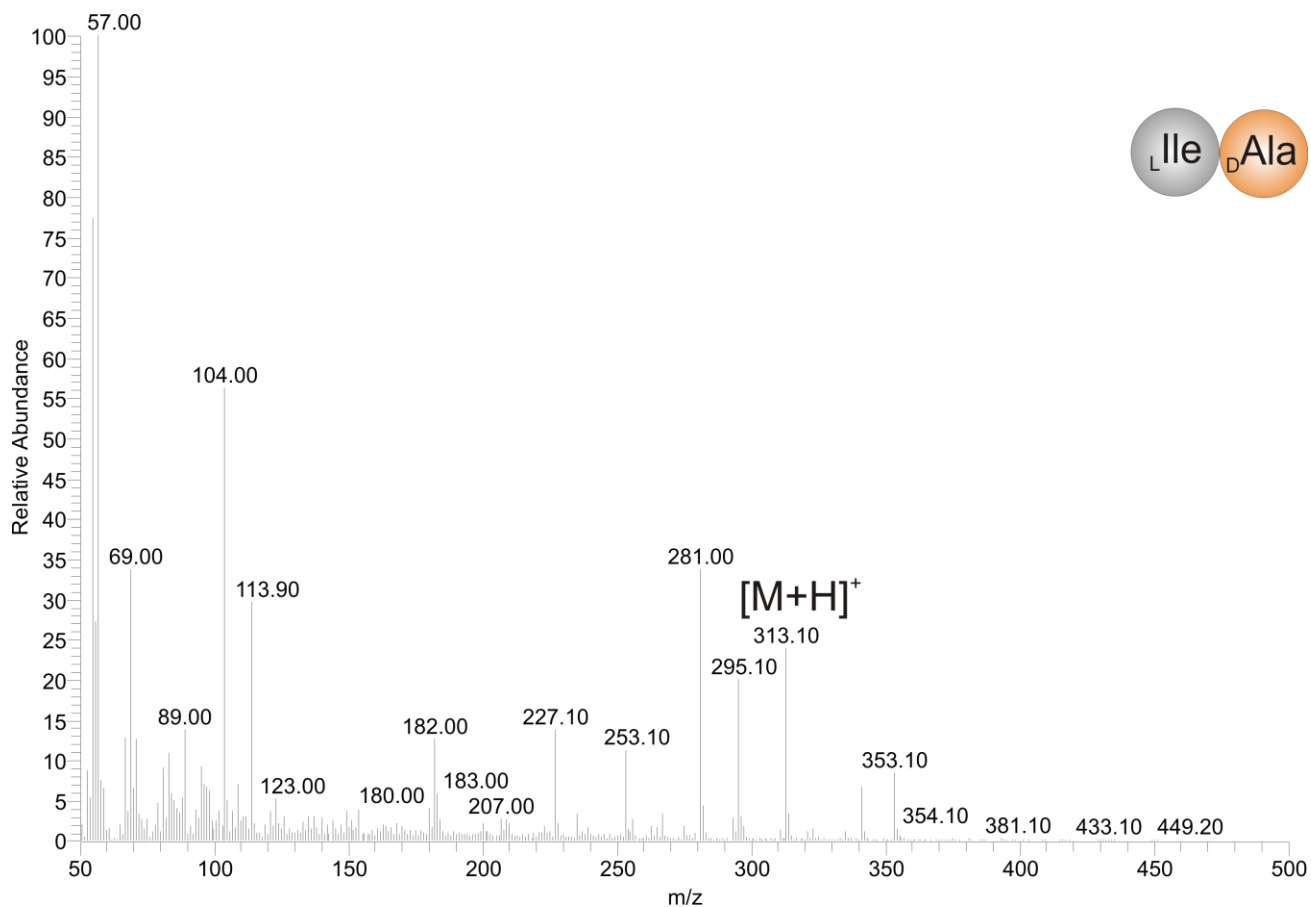

**Figure S16.** EI-MS spectra of *N*-trifluoroacetyl-<sup>(L)</sup>Ile-<sup>(D)</sup>Ala-methyl ester found in partial hydrolysate of (1a) at  $R_t = 19.97$  min on a Chirasil<sup>®</sup>-(L)-Val column.

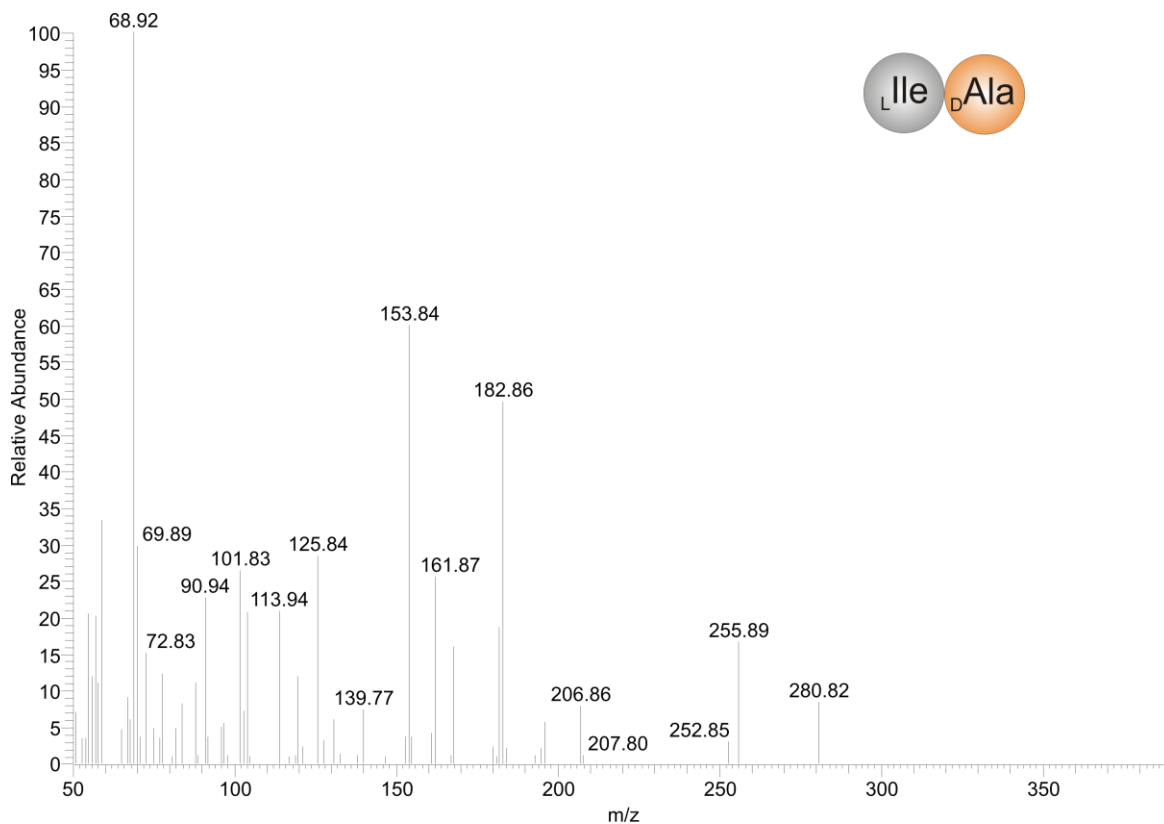

**Figure S17.** PCI-MS spectra of *N*-trifluoroacetyl-<sup>(L)</sup>Ile-<sup>(L)</sup>Ile-methyl ester found in partial hydrolysate of (1a) at  $R_t = 22.5$  min on a Chirasil<sup>®</sup>-(L)-Val column.

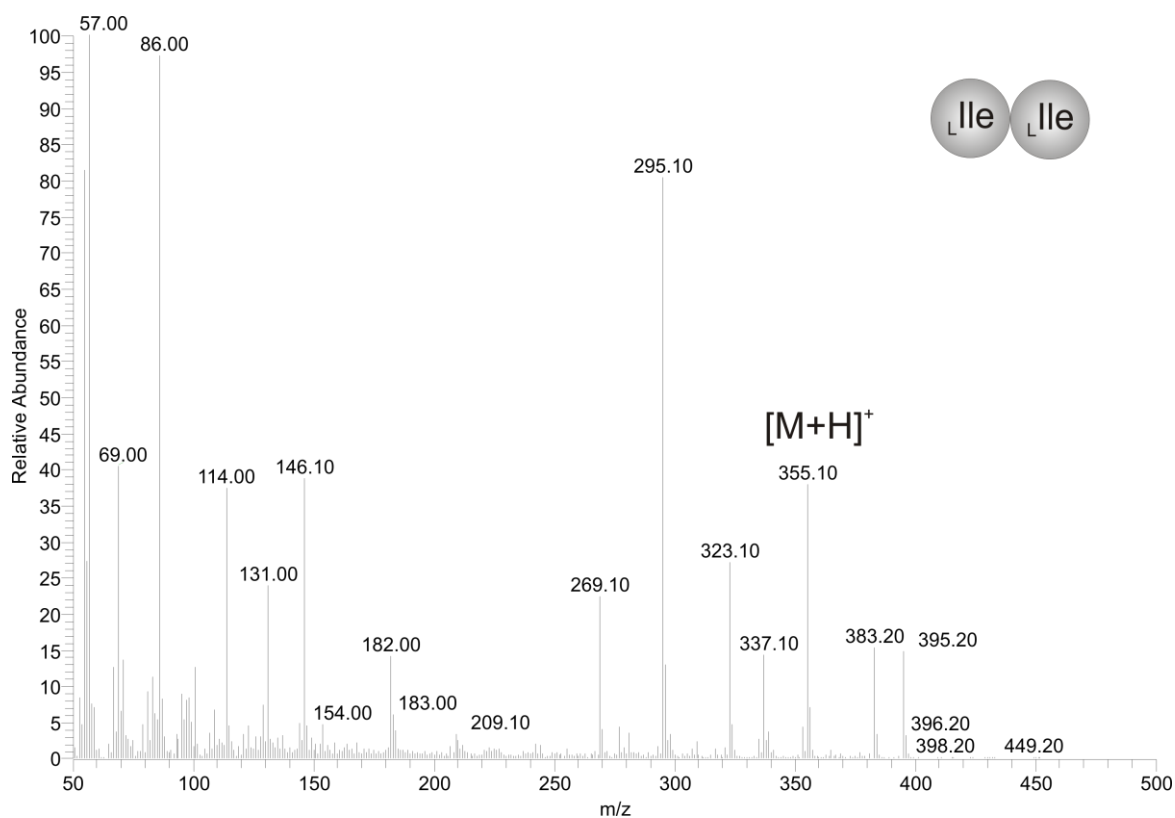

**Figure S18.** EI-MS spectra of *N*-trifluoroacetyl-(*L*)Ile-(*L*)Ile-methyl ester found in partial hydrolysate of (**1a**) at  $R_t = 22.5$  min on a Chirasil<sup>®</sup>-(*L*)-Val column.

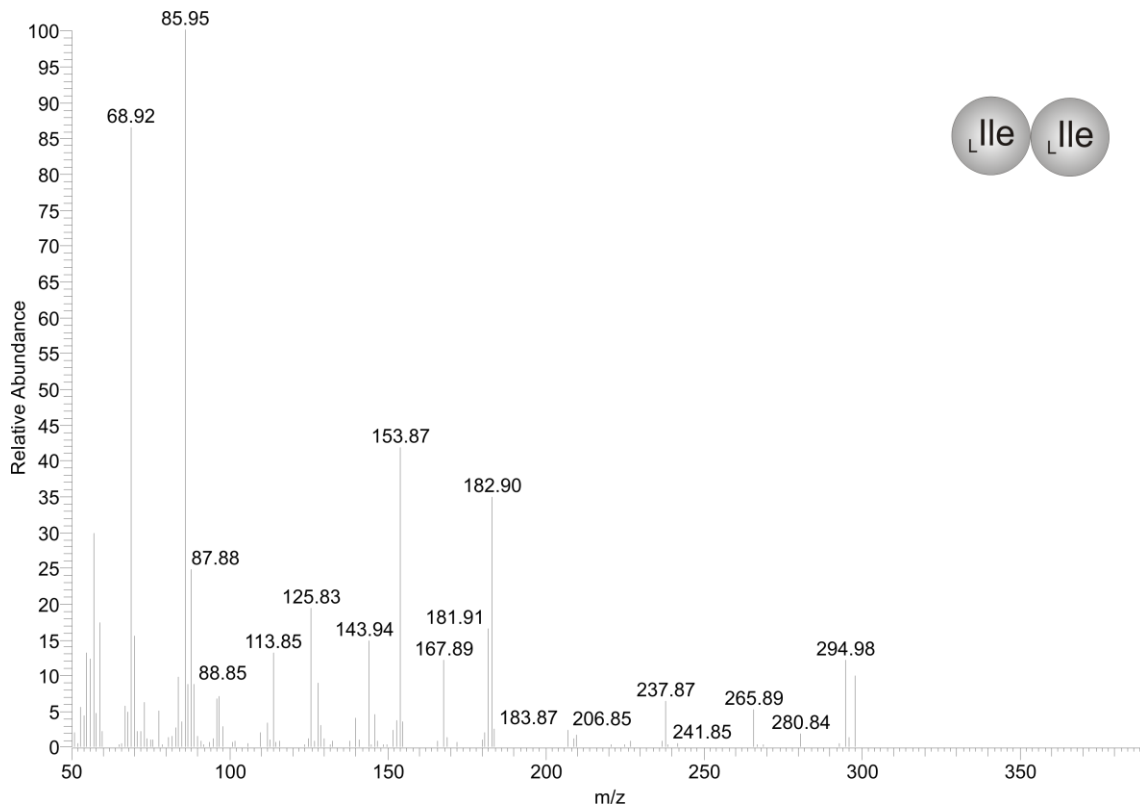

**Figure S19.** PCI-MS spectra of *N*-trifluoroacetyl-(*D*)Leu-(*L*)Ile-methyl ester found in partial hydrolysate of (**1a**) at  $R_t = 24.6$  min on a Chirasil<sup>®</sup>-(*L*)-Val column.

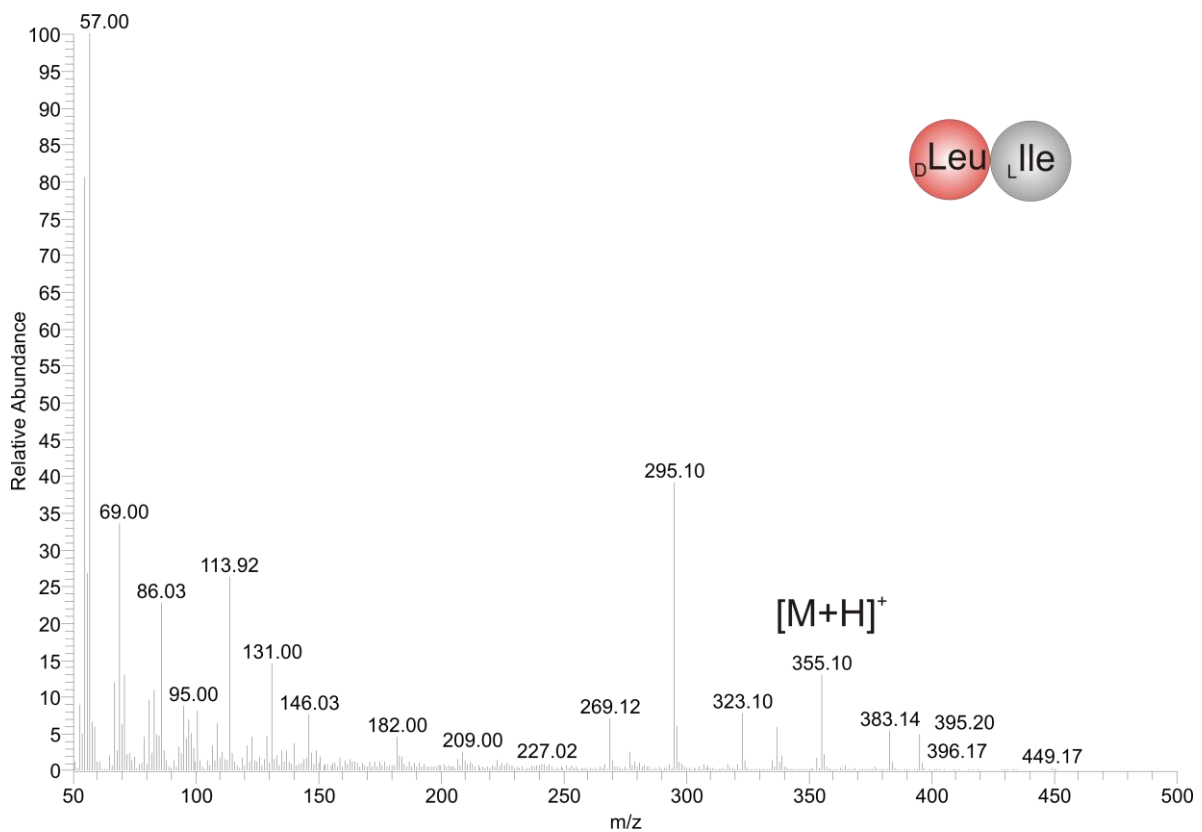

**Figure S20.** EI-MS spectra of *N*-trifluoroacetyl-<sup>(D)</sup>Leu-<sup>(L)</sup>Ile-methyl ester found in partial hydrolysate of (1a) at  $R_t = 24.6$  min on a Chirasil<sup>®</sup>-(L)-Val column.

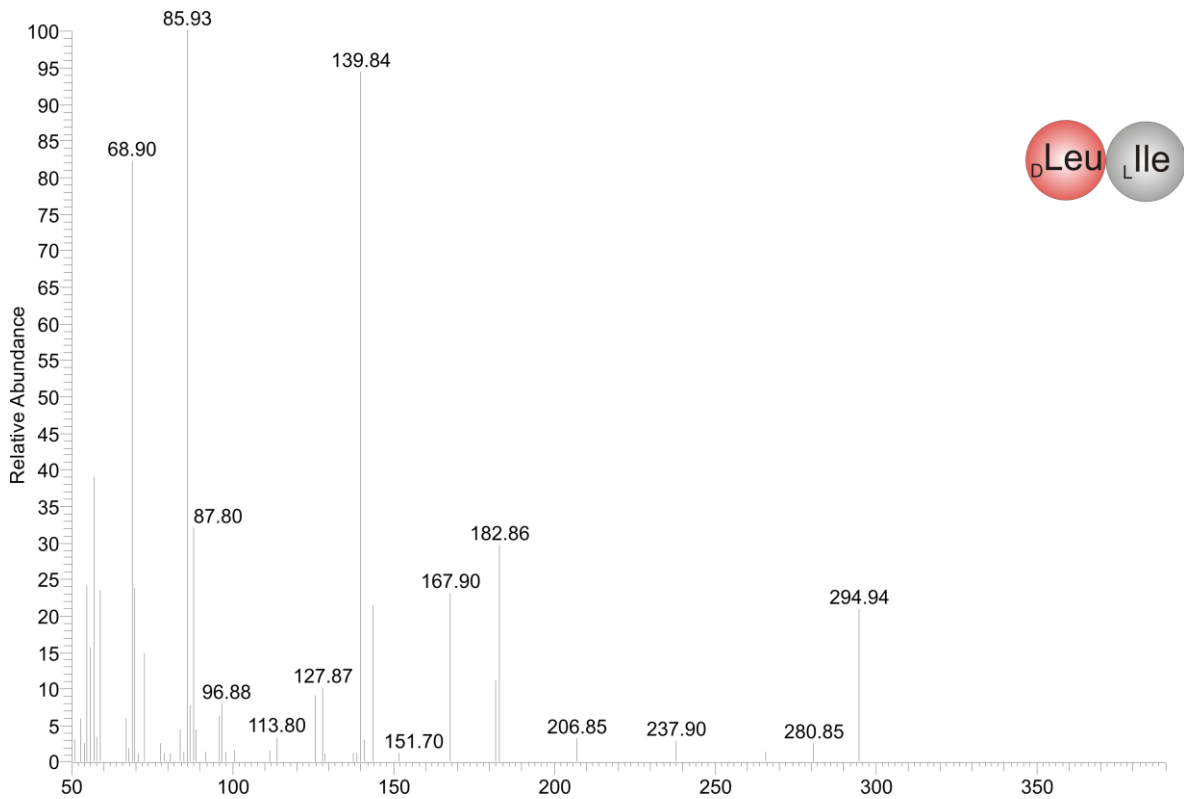

**Figure S21.** PCI-MS spectra of *N*-trifluoroacetyl-<sup>(L)</sup>Ile-<sup>(D)</sup>Phe-methyl ester found in partial hydrolysate of (1a) at  $R_t = 46.68$  min on a Chirasil<sup>®</sup>-(L)-Val column.

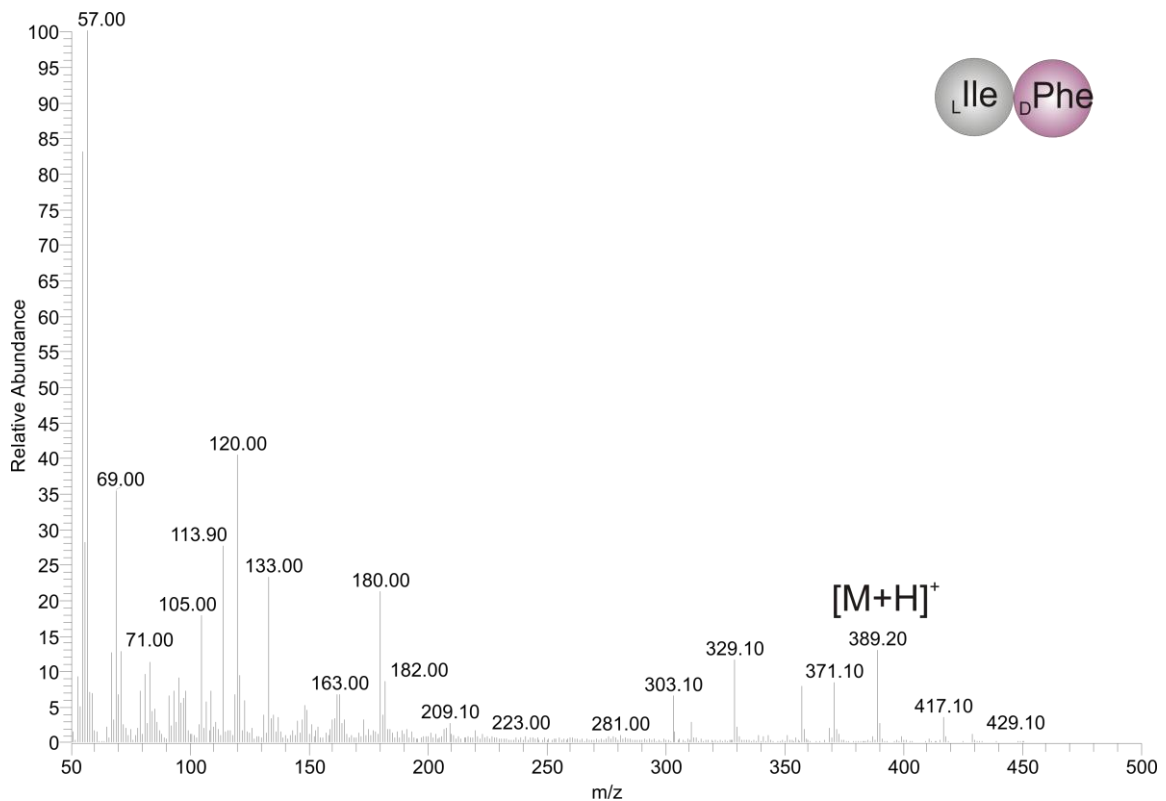



**Figure S22.** EI-MS spectra of *N*-trifluoroacetyl-(*L*)Ile-(*D*)Phe-methyl ester found in partial hydrolysate of (**1a**) at  $R_t = 46.68$  min on a Chirasil<sup>®</sup>-(*L*)-Val column.

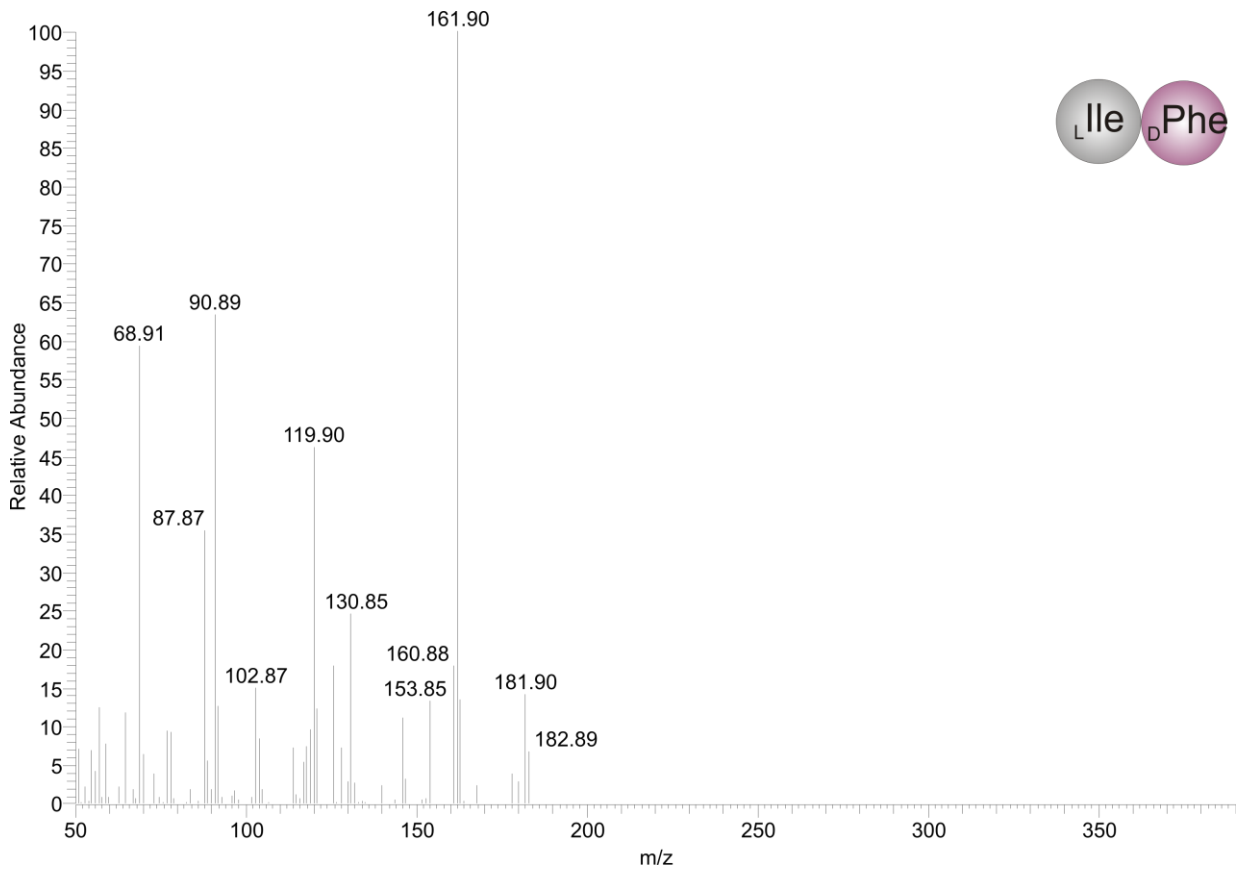

**Figure S23.** PCI-MS spectra of synthetic *N*-trifluoroacetyl-Leu-Leu-methyl ester.

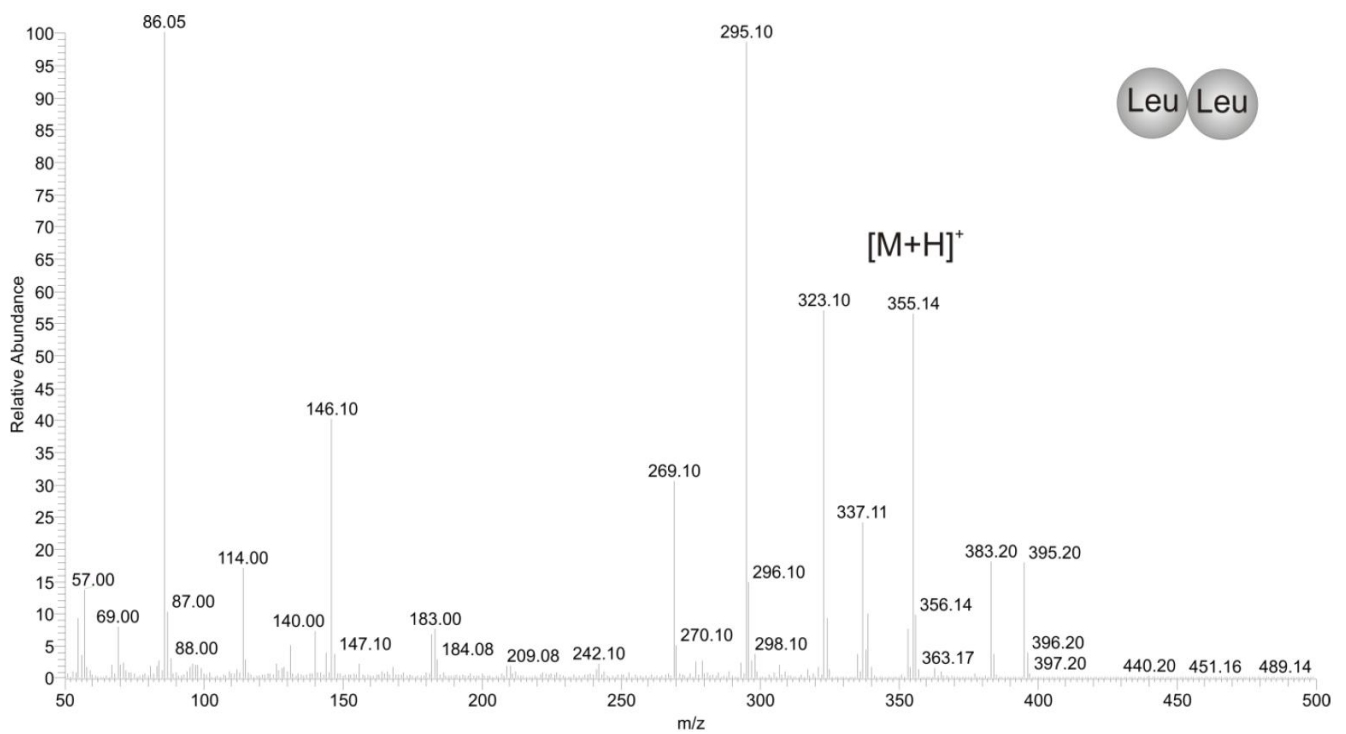

**Figure S24.** EI-MS spectra of synthetic *N*-trifluoroacetyl-Leu-Leu-methyl ester.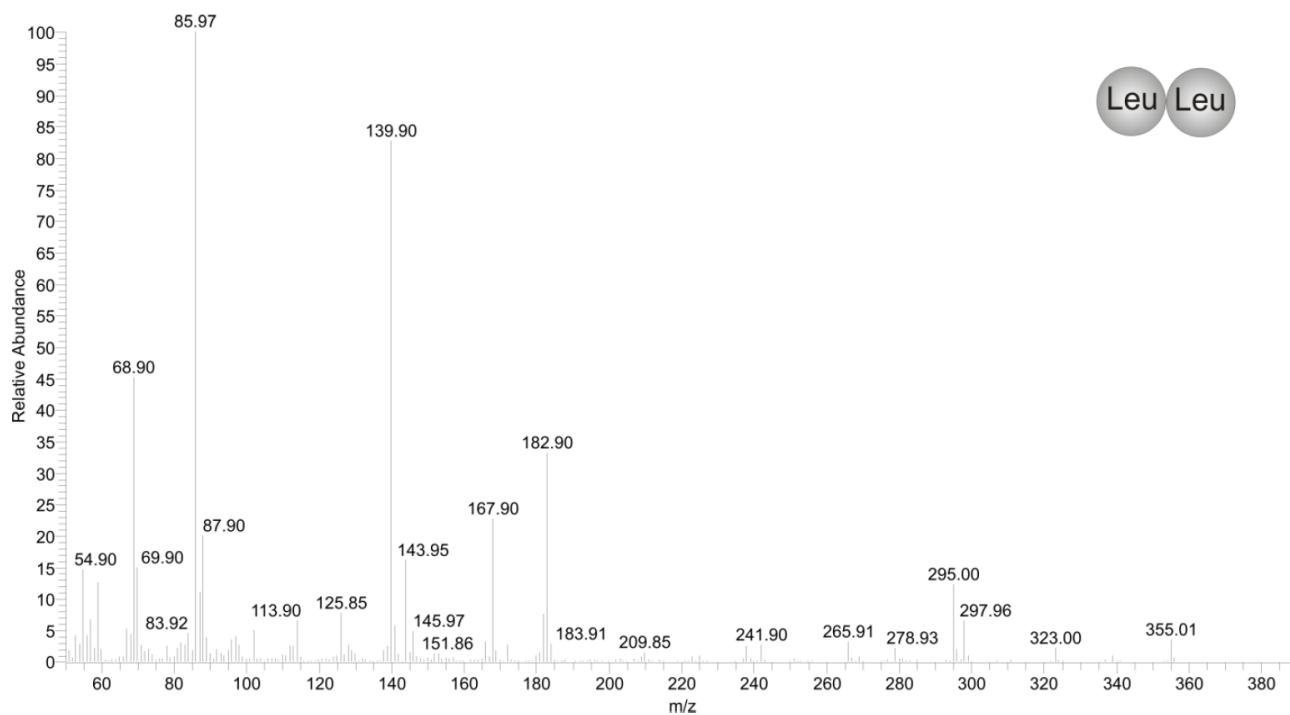**Figure S25.** PCI-MS spectra of synthetic *N*-trifluoroacetyl-Ile-Ile-methyl ester.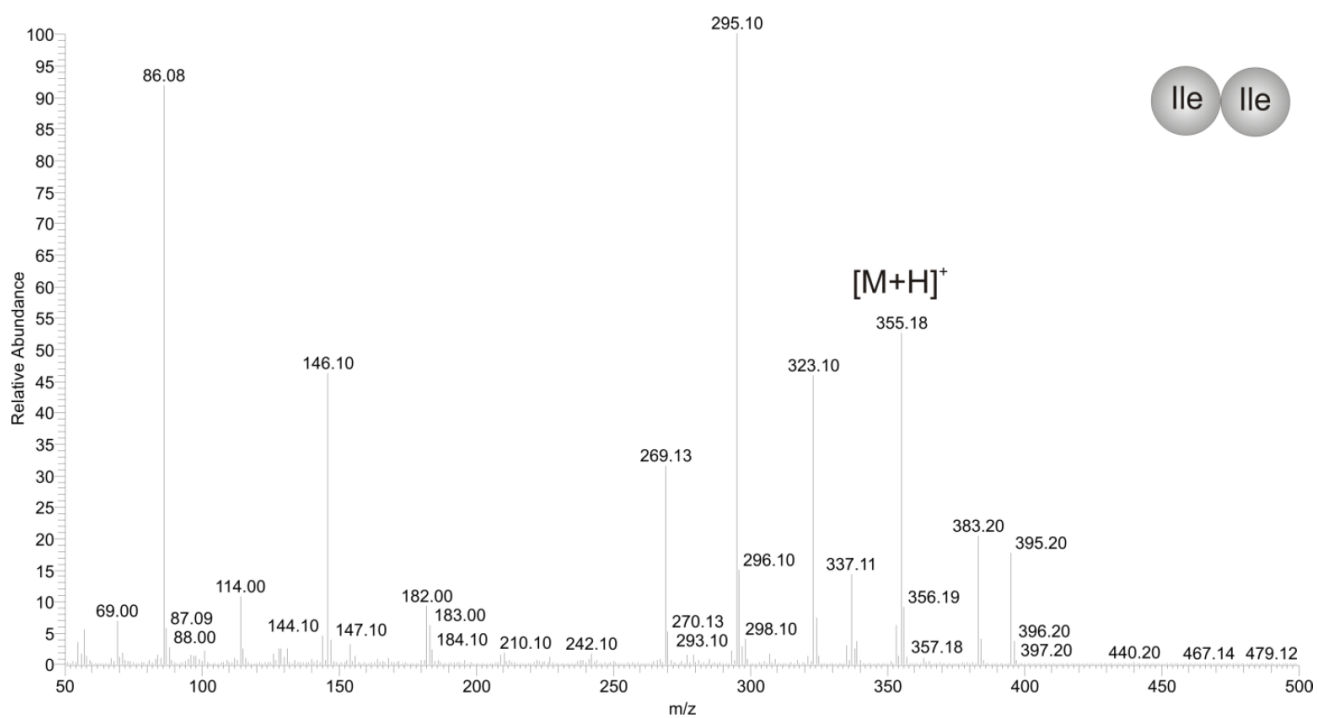

**Figure S26.** EI-MS spectra of synthetic *N*-trifluoroacetyl-Ile-Ile-methyl ester.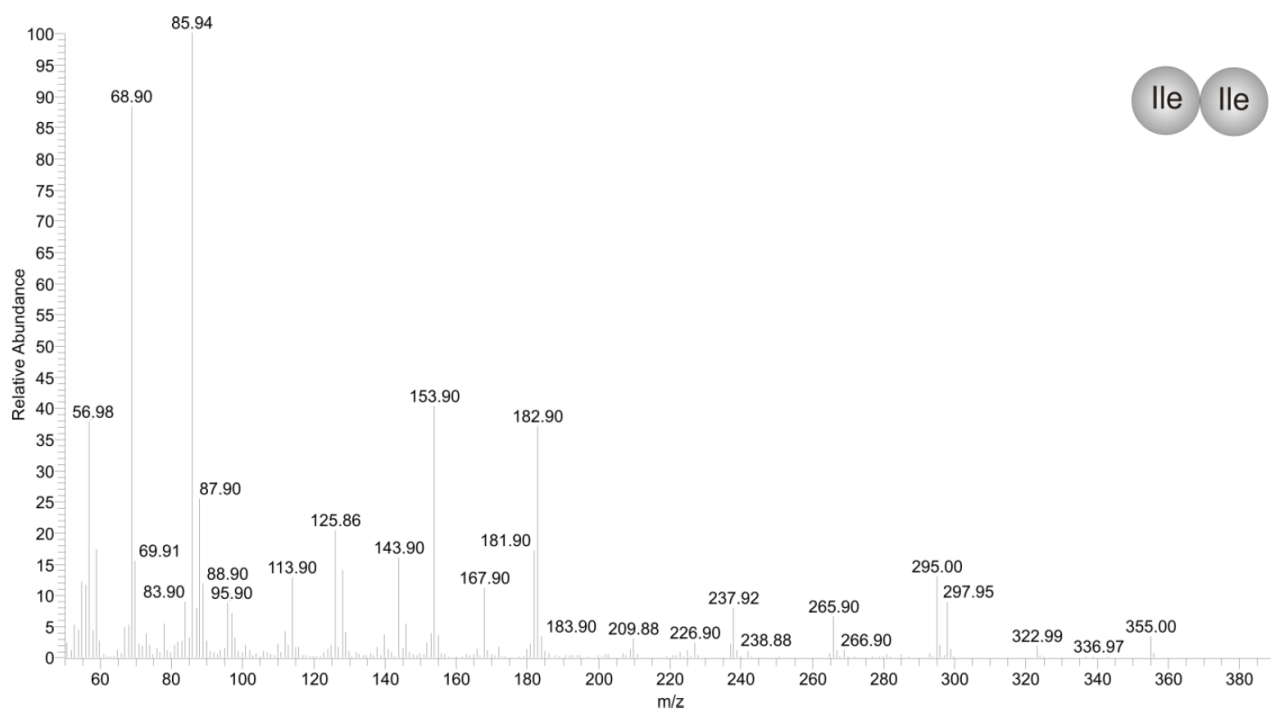**Figure S27.** PCI-MS spectra of synthetic *N*-trifluoroacetyl-Leu-Ile-methyl ester.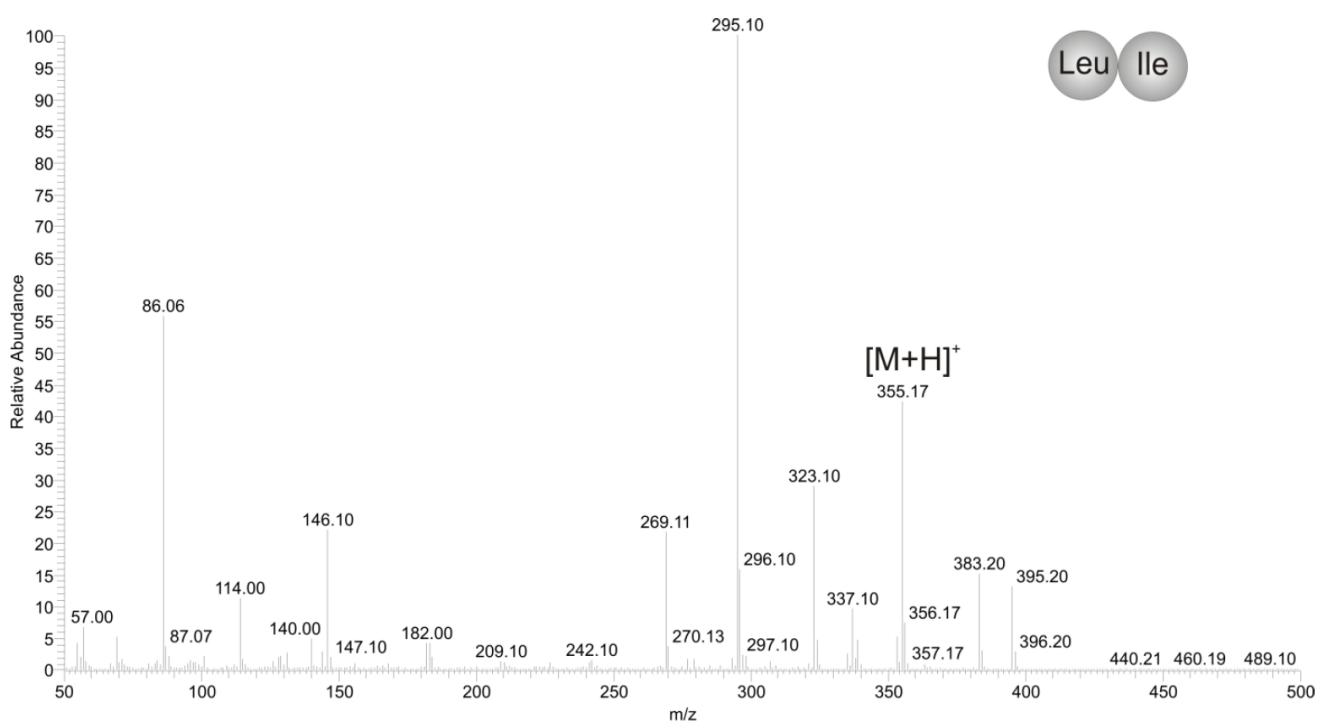

**Figure S28.** EI-MS spectra of synthetic *N*-trifluoroacetyl-Leu-Ile-methyl ester.

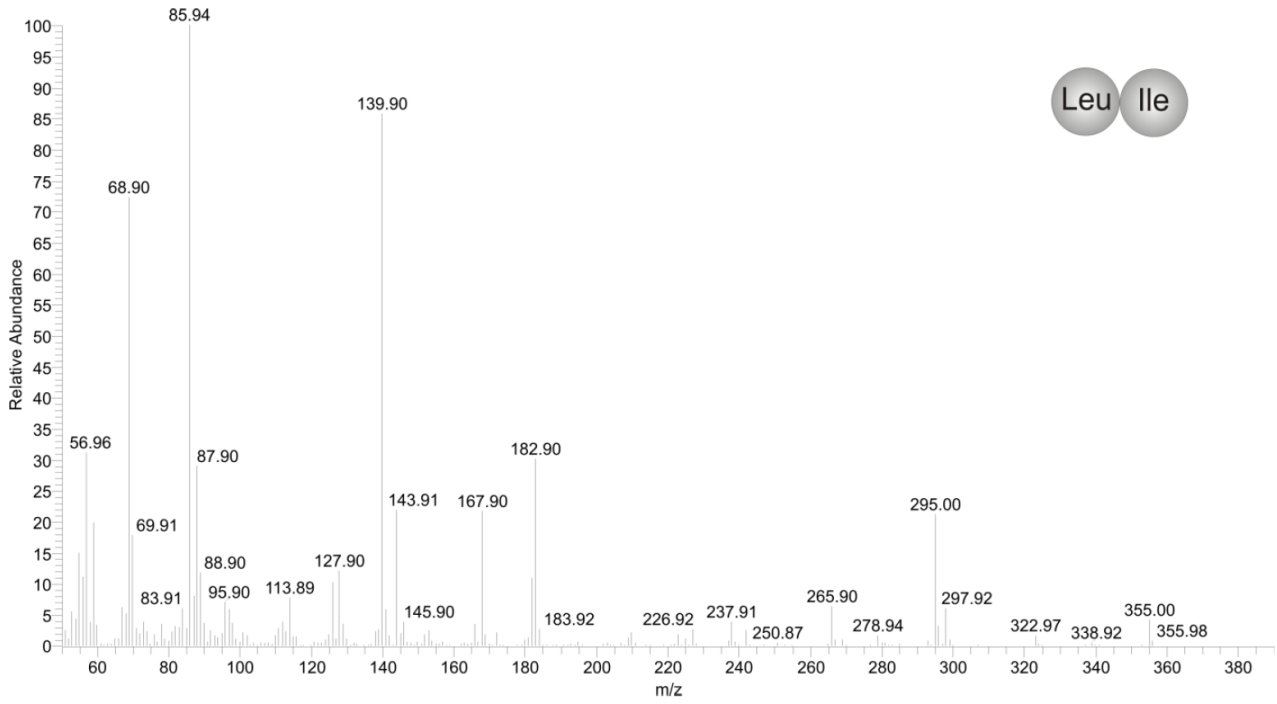

**Figure S29.** PCI-MS spectra of synthetic *N*-trifluoroacetyl-Ile-Leu-methyl ester.

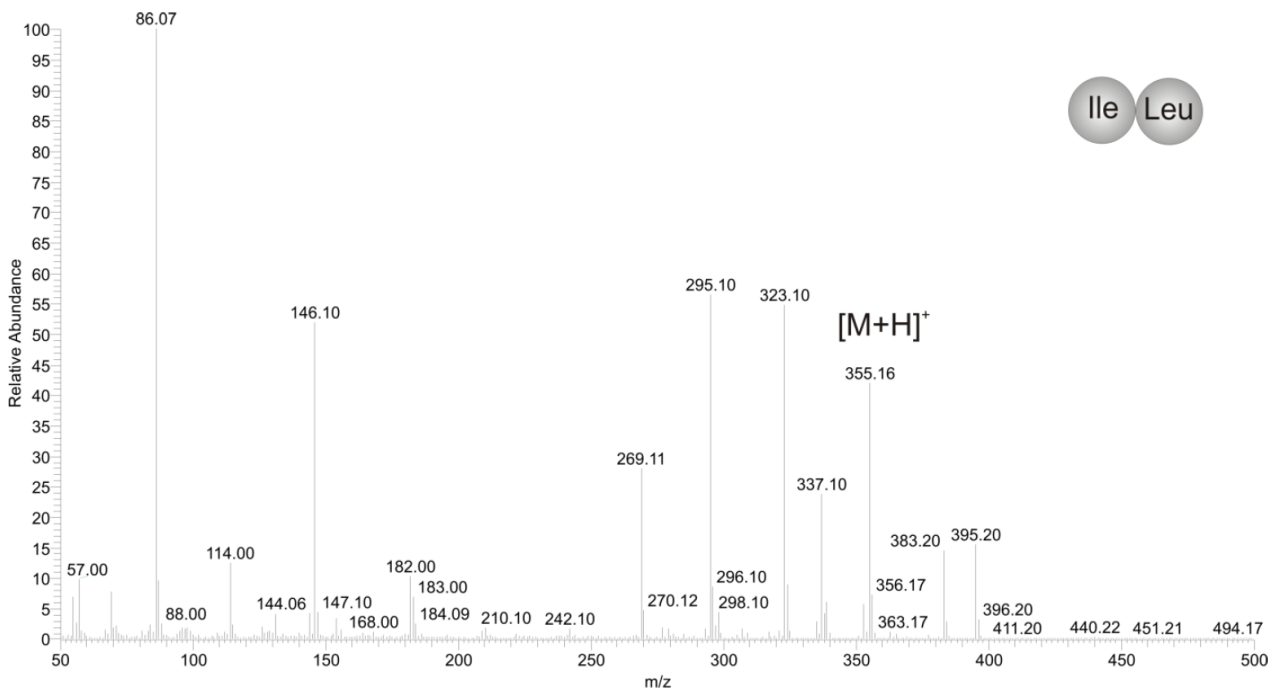

**Figure S30.** EI-MS spectra of synthetic *N*-trifluoroacetyl-Ile-Leu-methyl ester.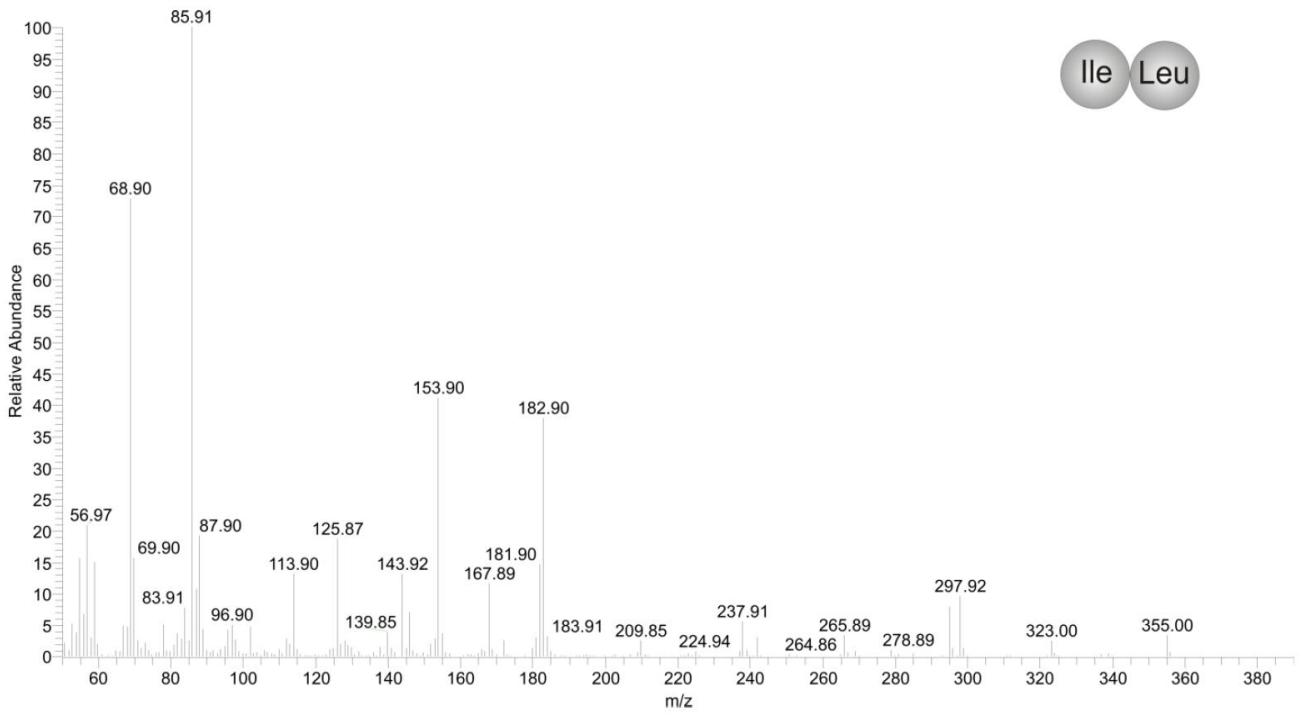**Figure S31.** PCI-MS spectra of synthetic *N*-trifluoroacetyl-Ala-Leu-methyl ester.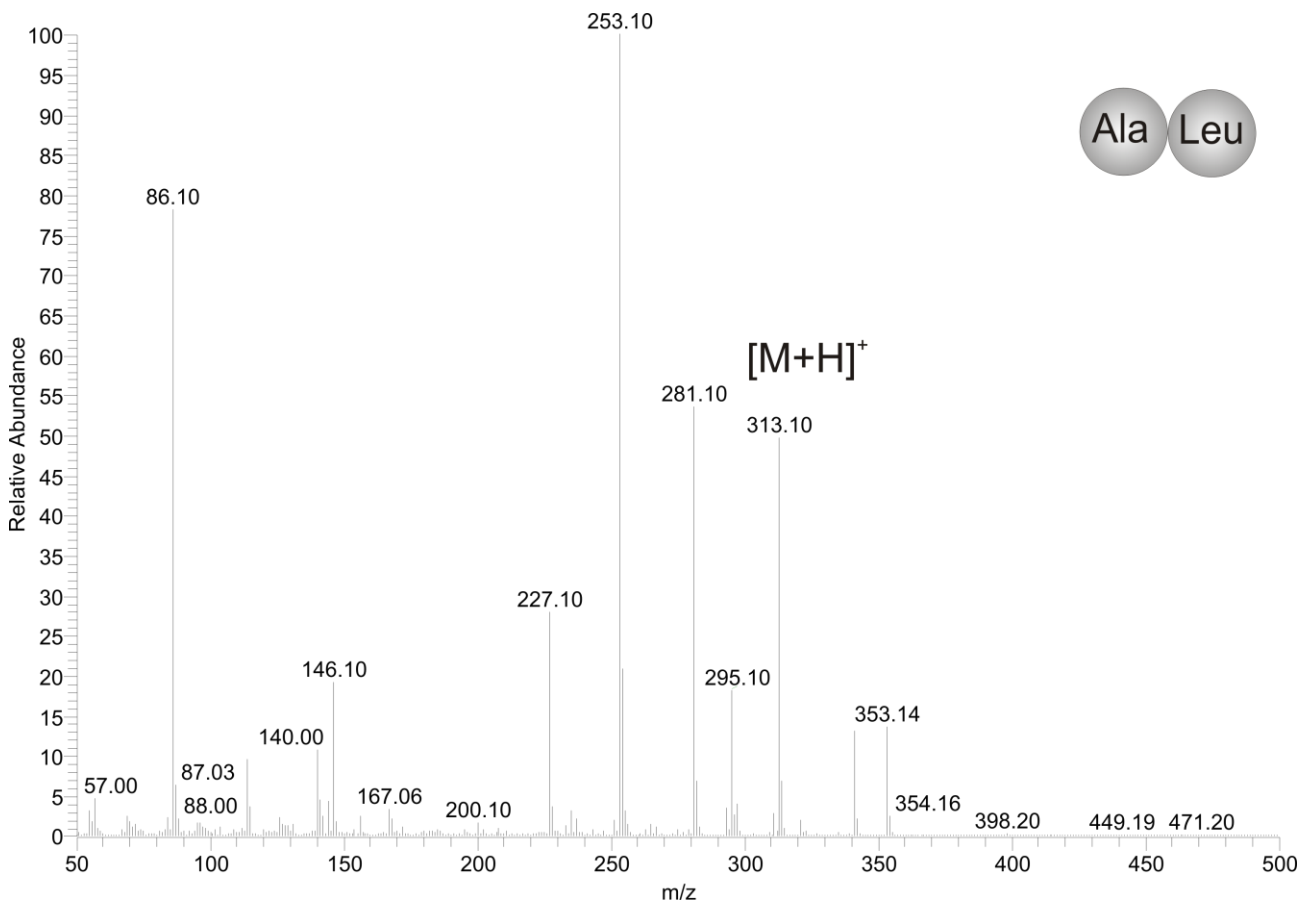

**Figure S32.** EI-MS spectra of synthetic *N*-trifluoroacetyl-Ala-Leu-methyl ester.

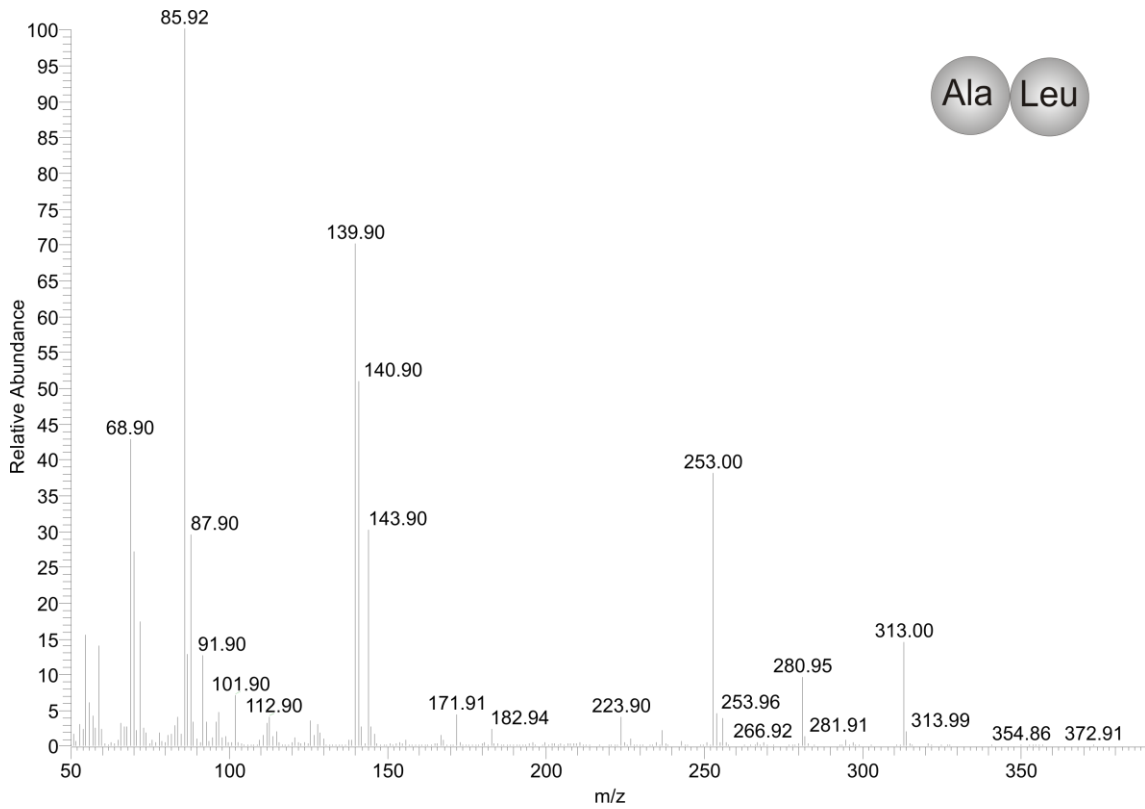

**Figure S33.** PCI-MS spectra of synthetic *N*-trifluoroacetyl-Leu-Ala-methyl ester.

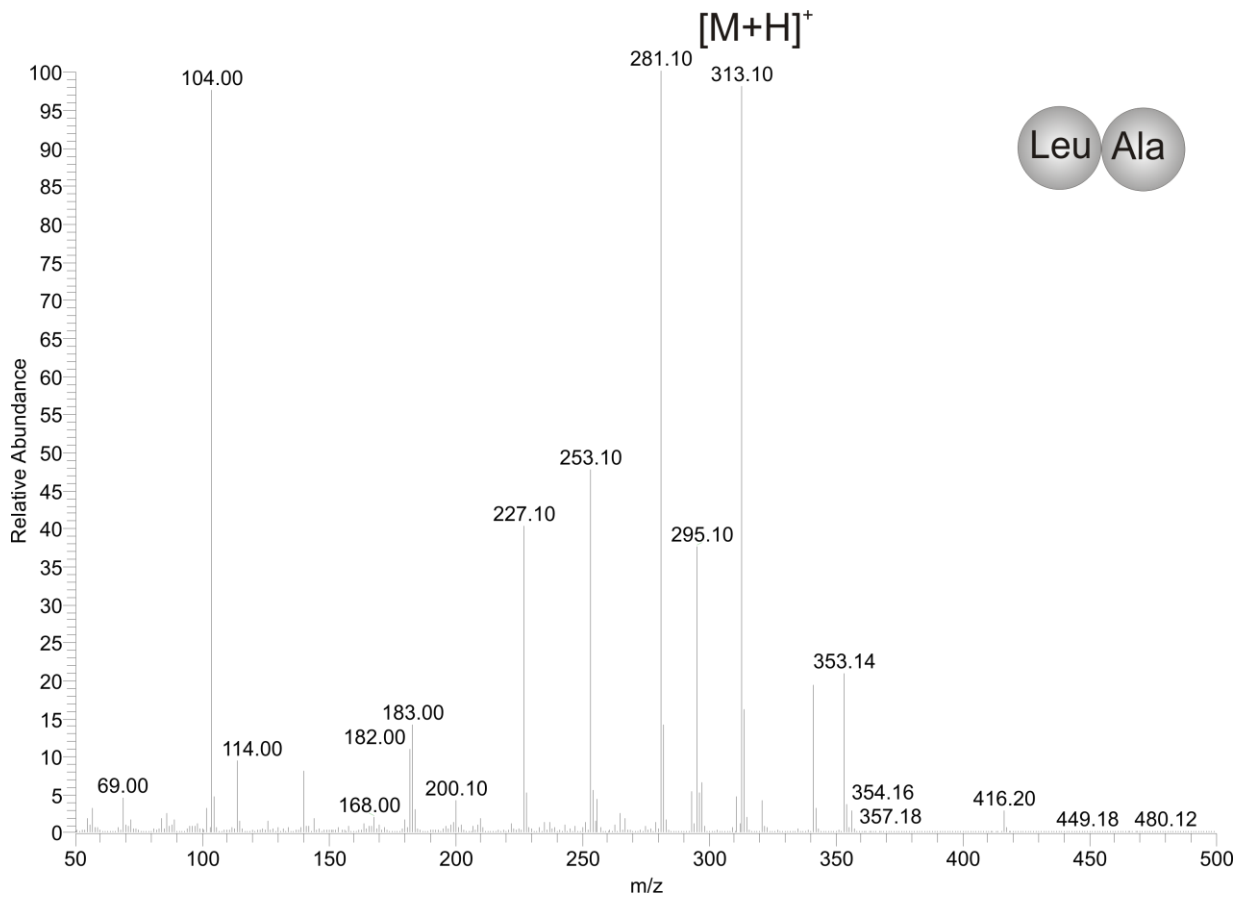

**Figure S34.** EI-MS spectra of synthetic *N*-trifluoroacetyl-Leu-Ala-methyl ester.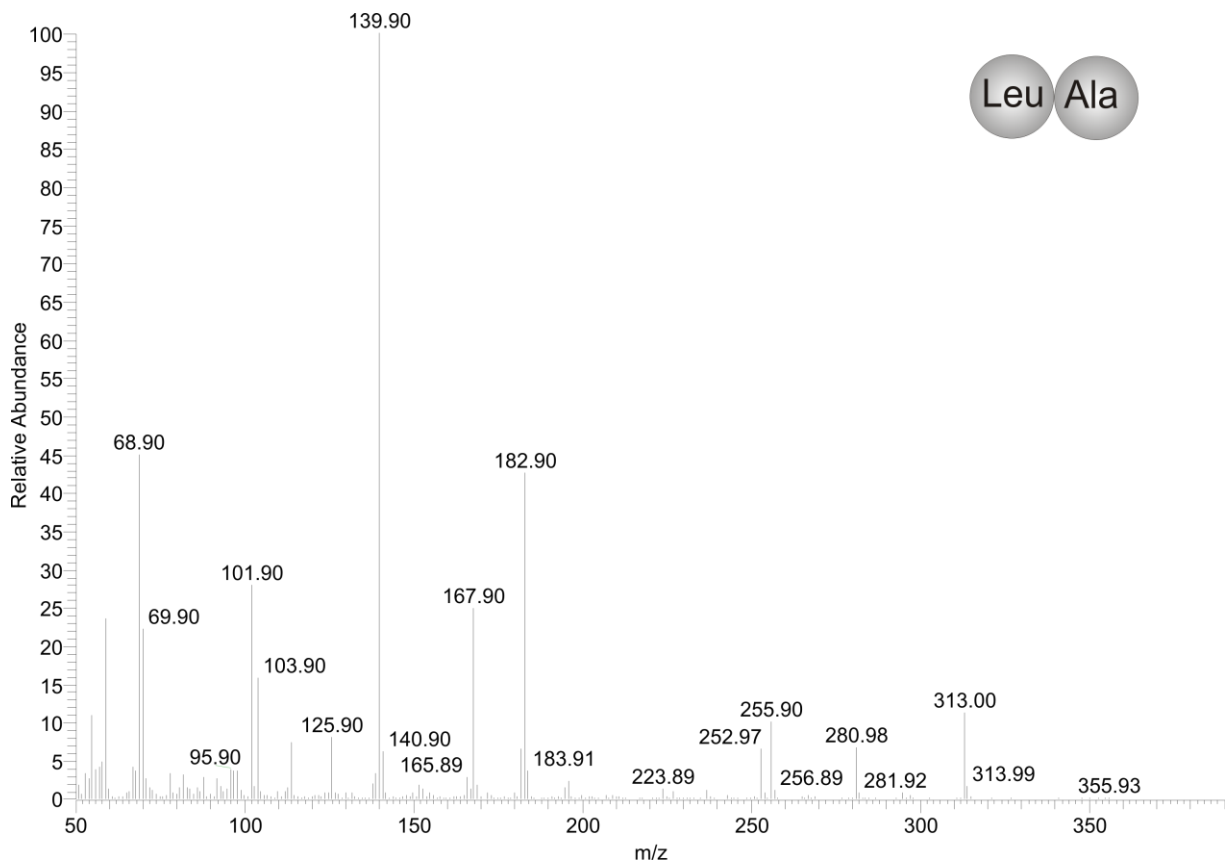**Figure S35.** PCI-MS spectra of synthetic *N*-trifluoroacetyl-Ala-Ile-methyl ester.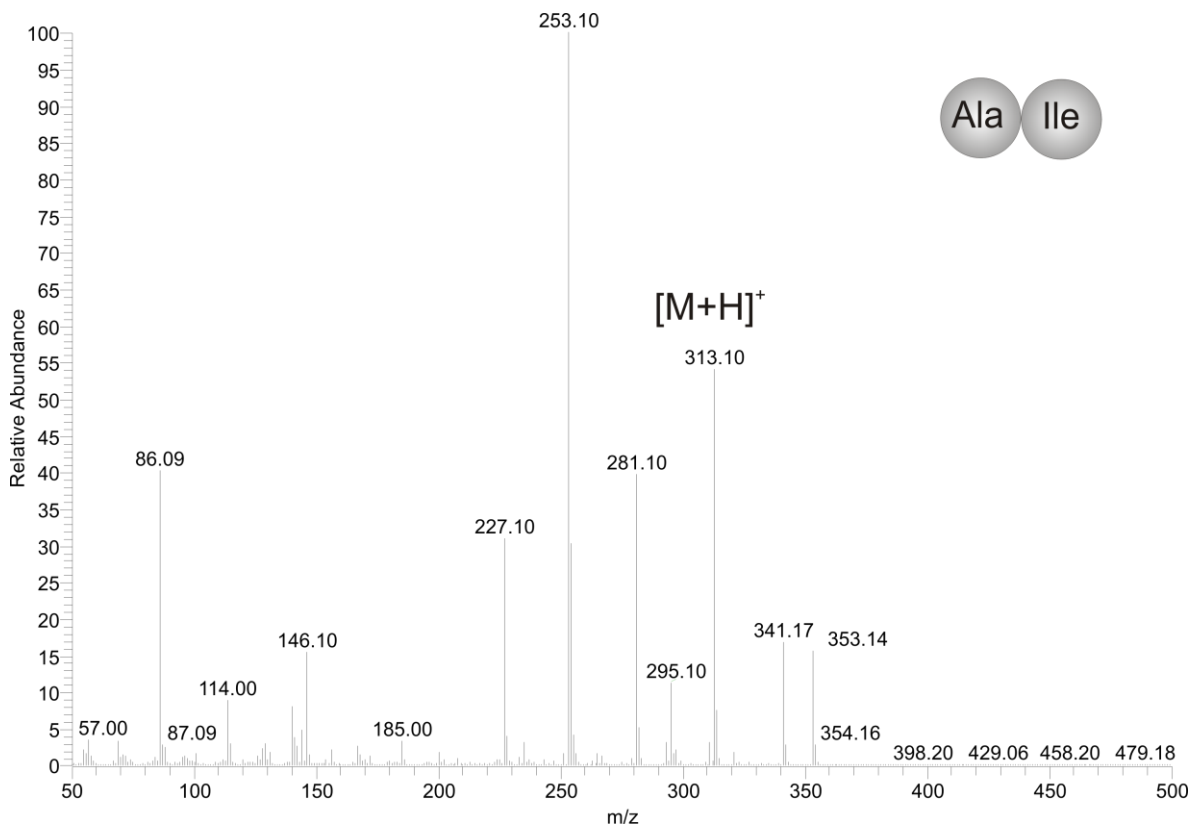

**Figure S36.** EI-MS spectra of synthetic *N*-trifluoroacetyl-Ala-Ile-methyl ester.

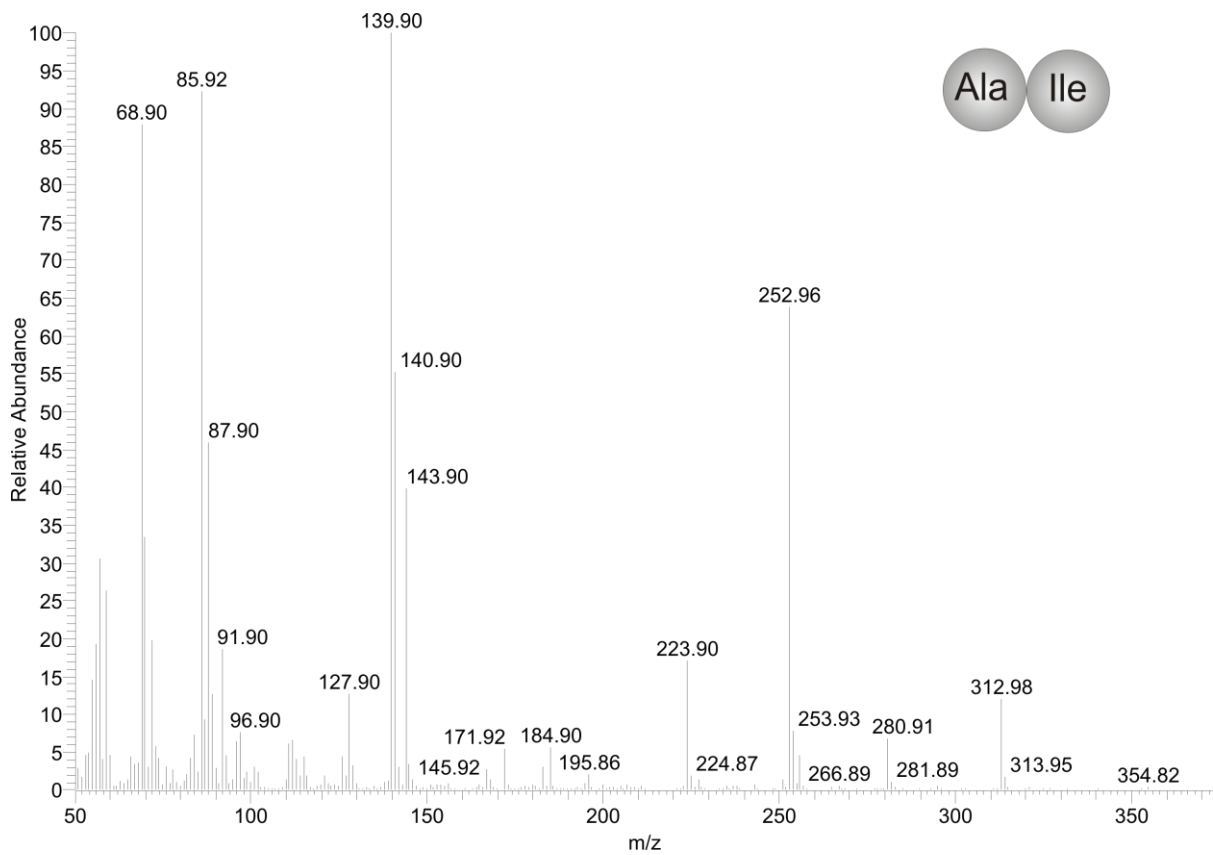

**Figure S37.** PCI-MS spectra of synthetic *N*-trifluoroacetyl-Ile-Ala-methyl ester.

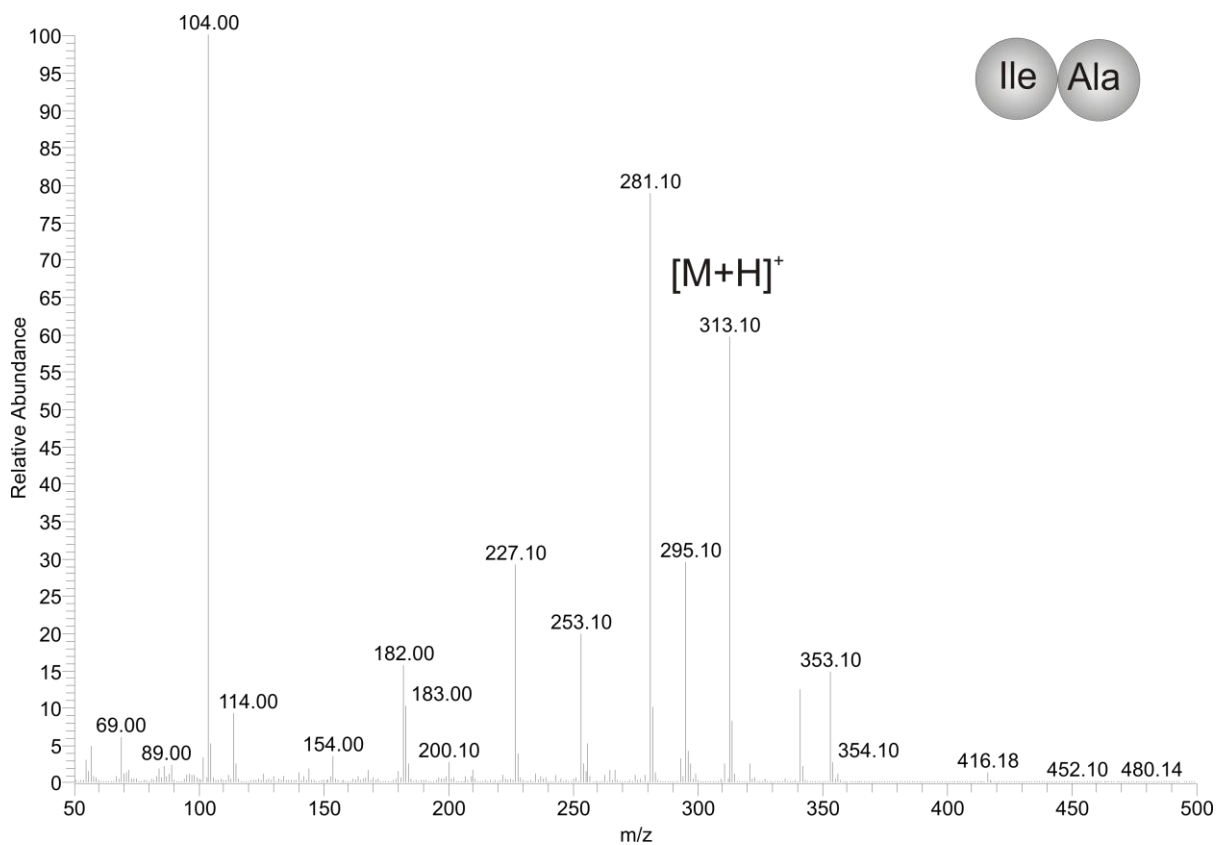



**Figure S38.** EI-MS spectra of synthetic *N*-trifluoroacetyl-Ile-Ala-methyl ester.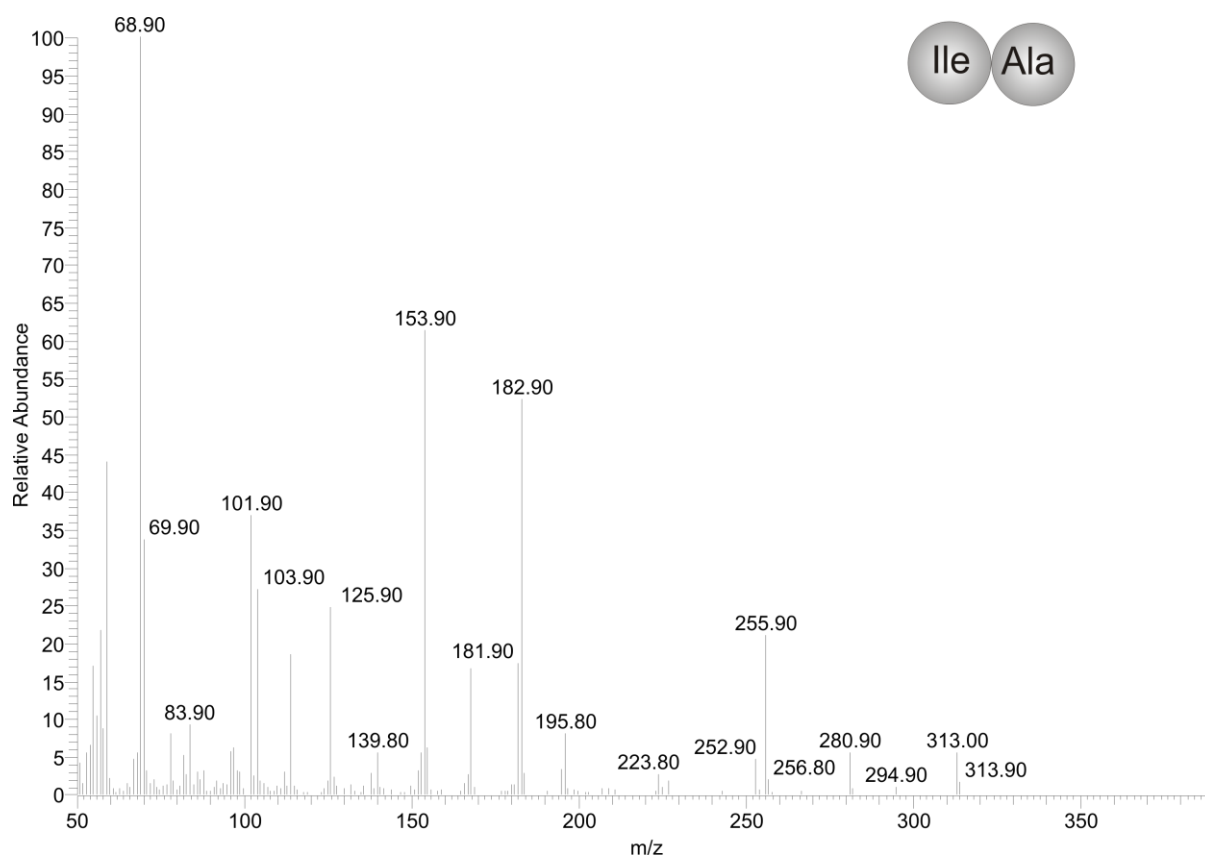**Figure S39.** PCI-MS spectra of synthetic *N*-trifluoroacetyl-Leu-Phe-methyl ester.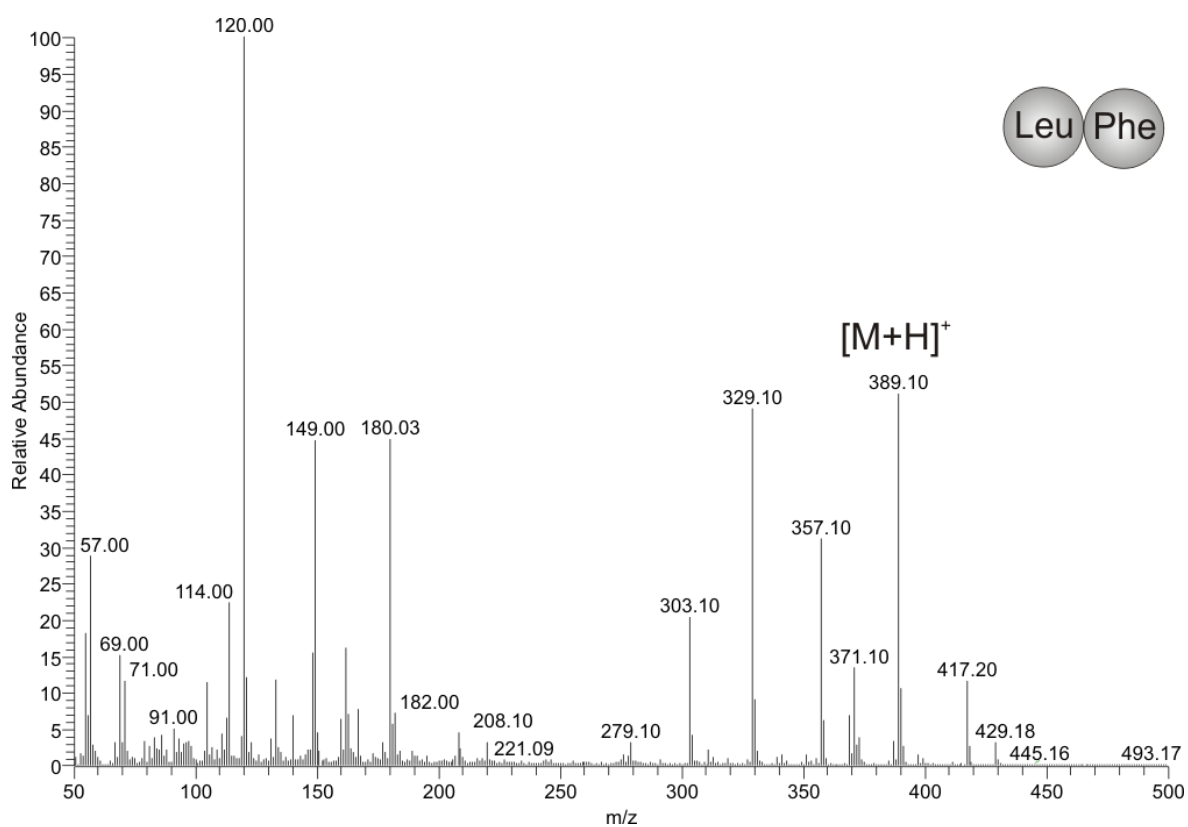

**Figure S40.** EI-MS spectra of synthetic *N*-trifluoroacetyl-Leu-Phe-methyl ester.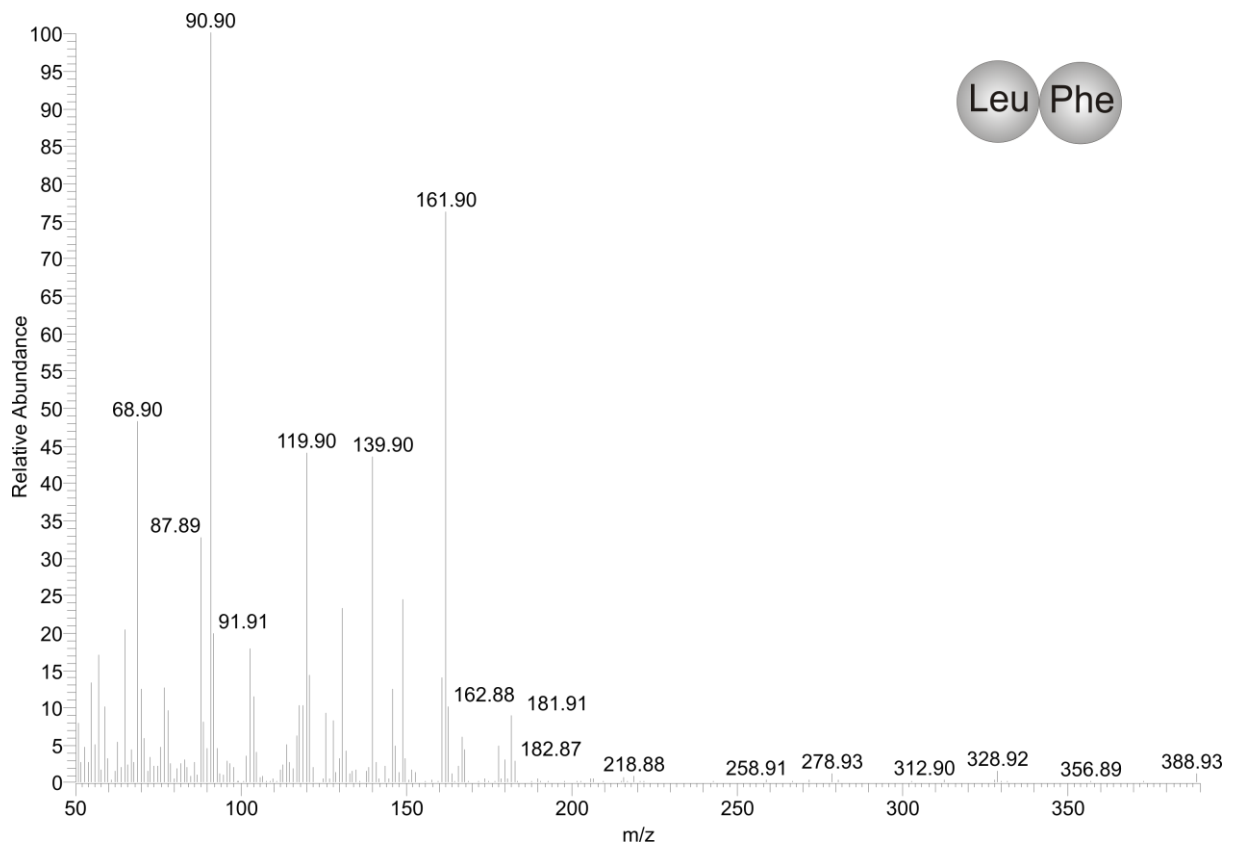**Figure S41.** PCI-MS spectra of synthetic *N*-trifluoroacetyl-Phe-Leu-methyl ester.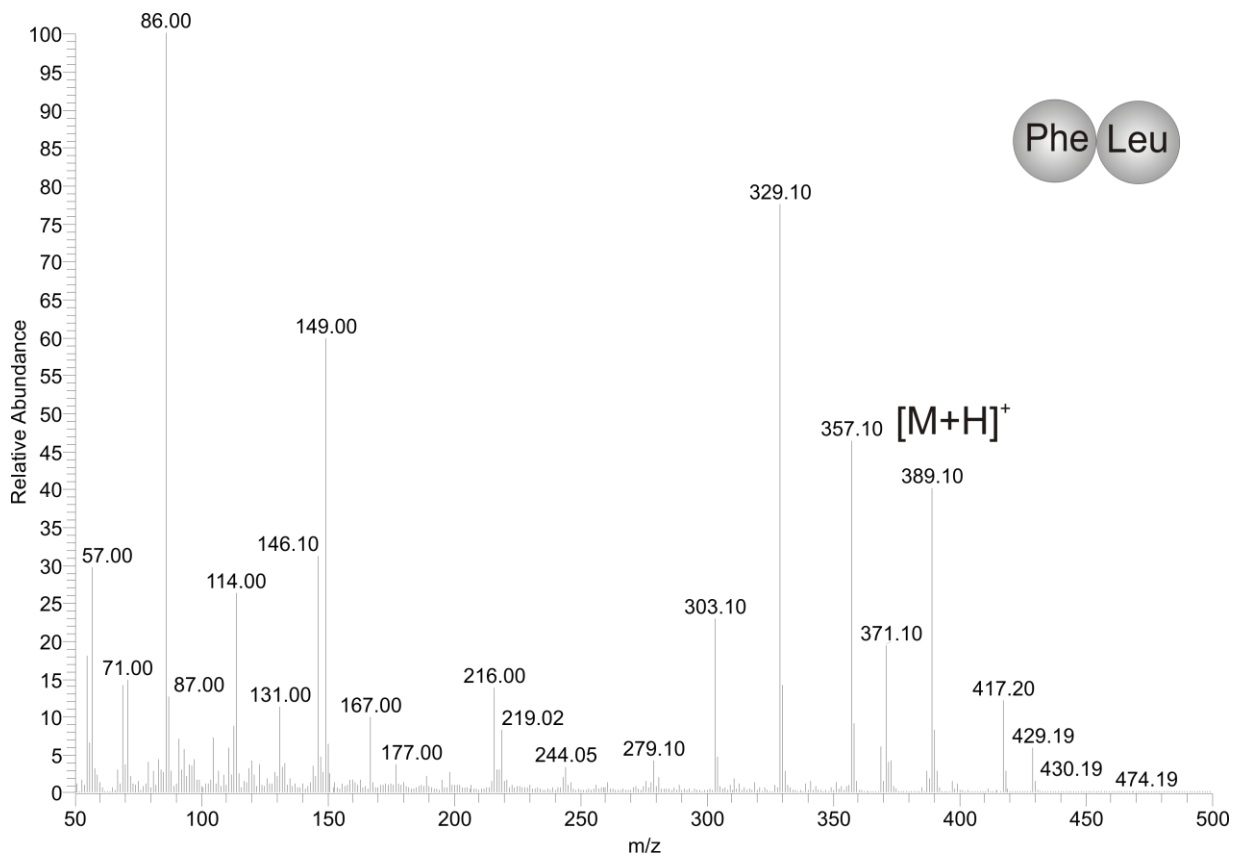

**Figure S42.** EI-MS spectra of synthetic *N*-trifluoroacetyl-Phe-Leu-methyl ester.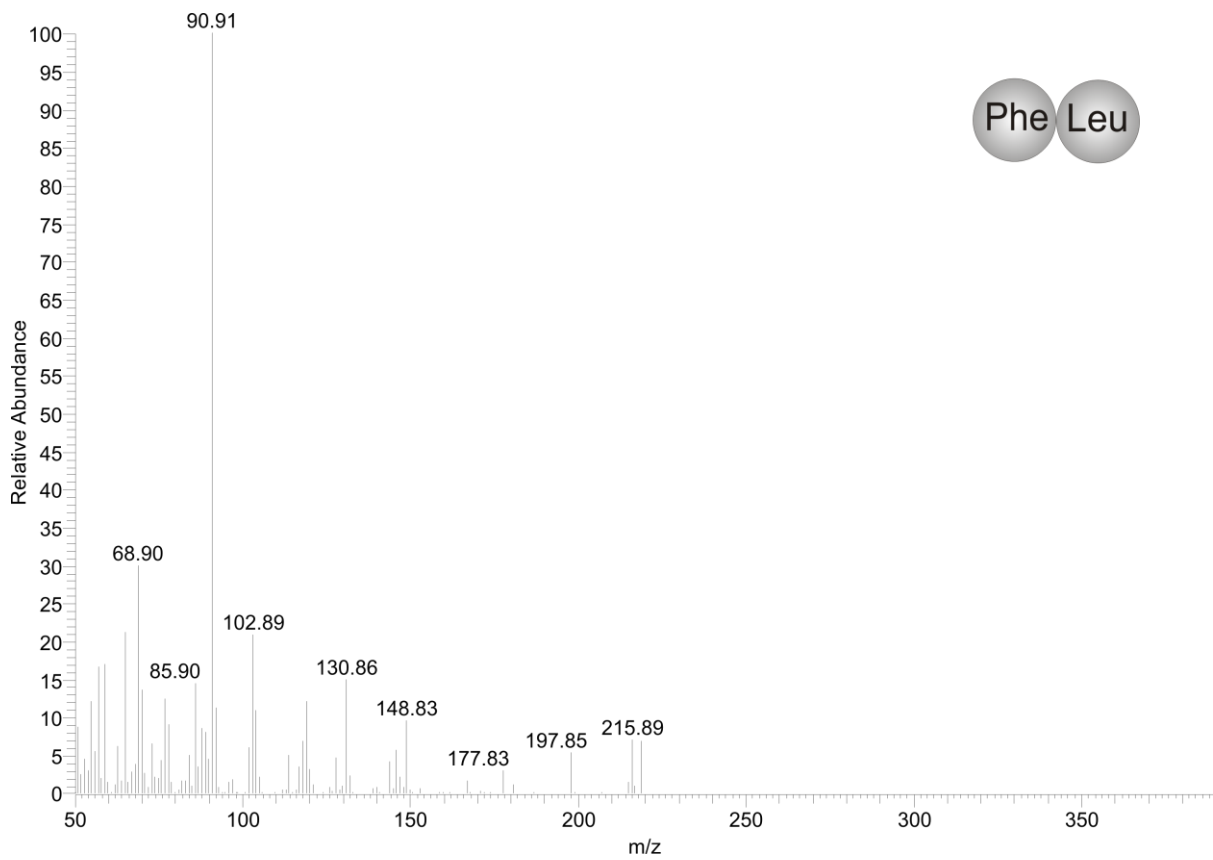**Figure S43.** PCI-MS spectra of synthetic *N*-trifluoroacetyl-Ile-Phe-methyl ester.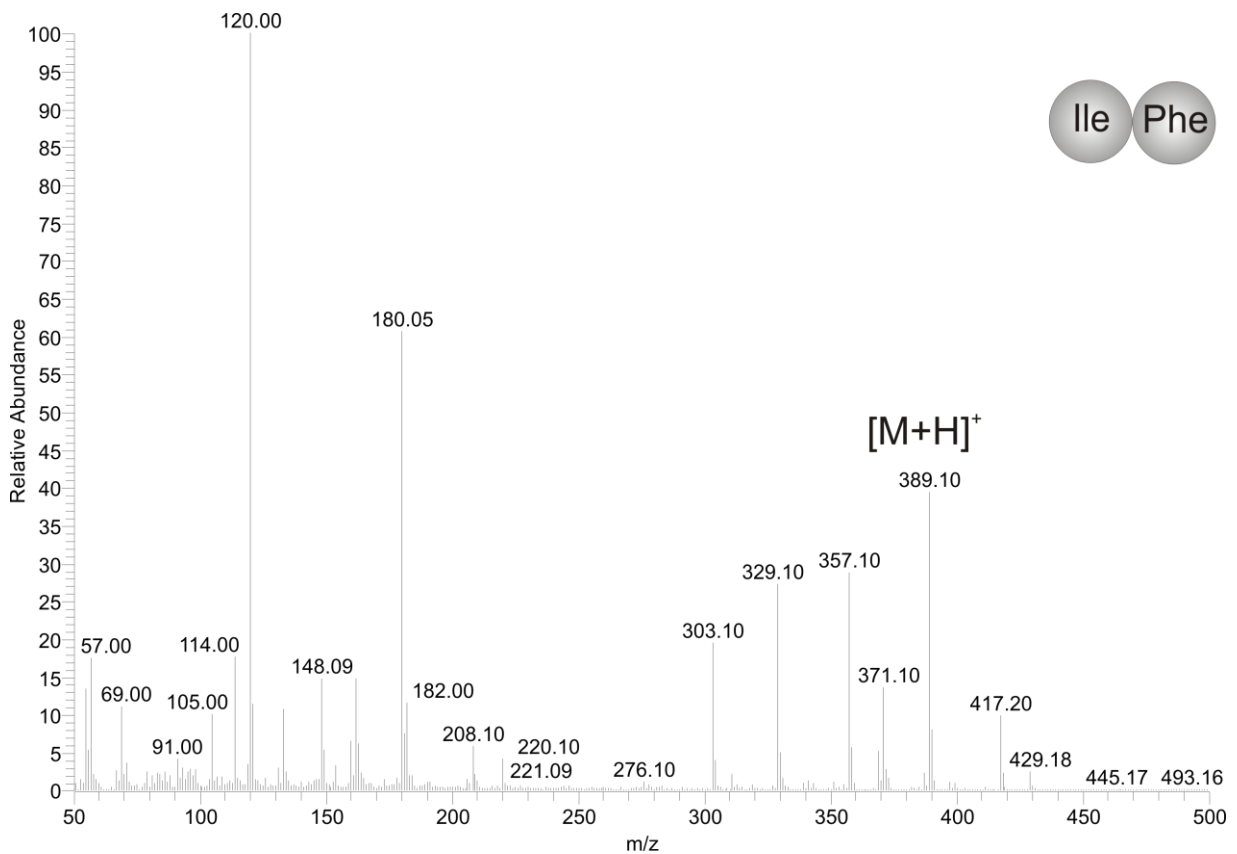

**Figure S44.** EI-MS spectra of synthetic *N*-trifluoroacetyl-Ile-Phe-methyl ester.

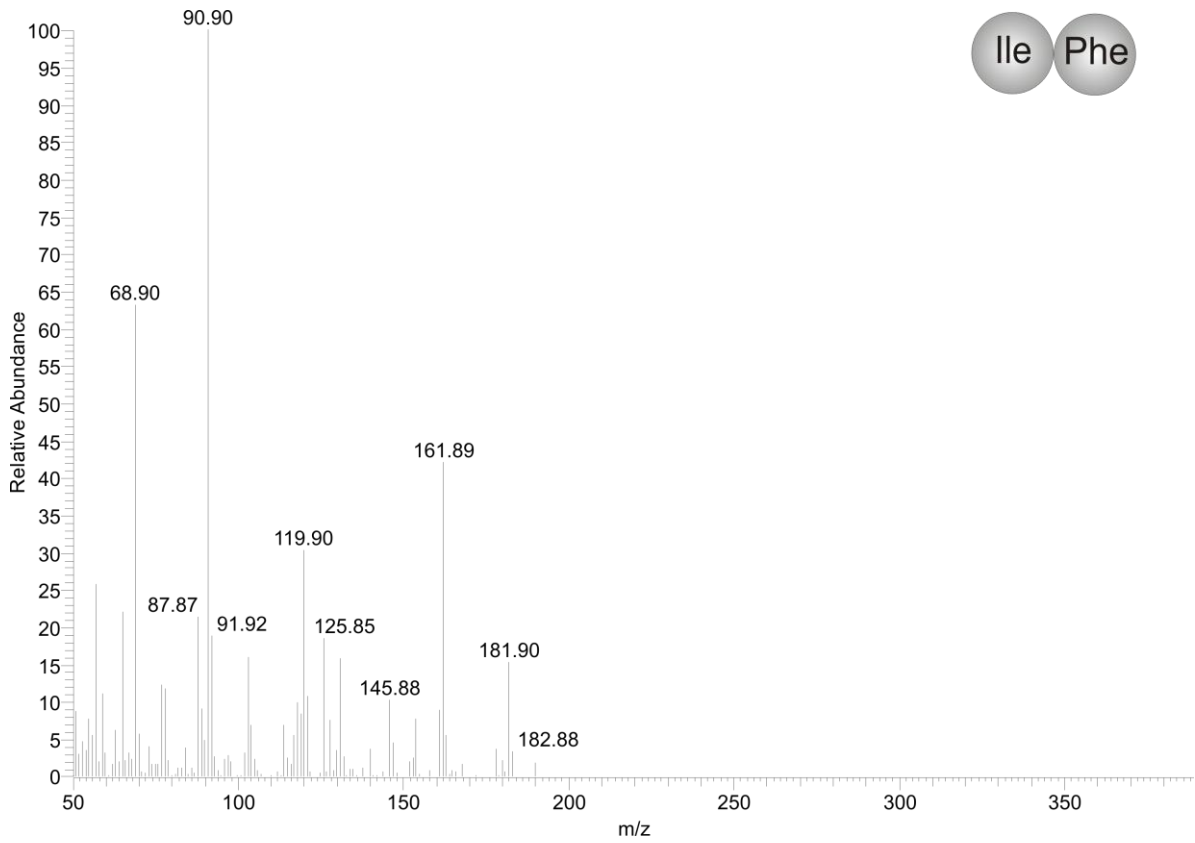

**Figure S45.** PCI-MS spectra of synthetic *N*-trifluoroacetyl-Phe-Ile-methyl ester.

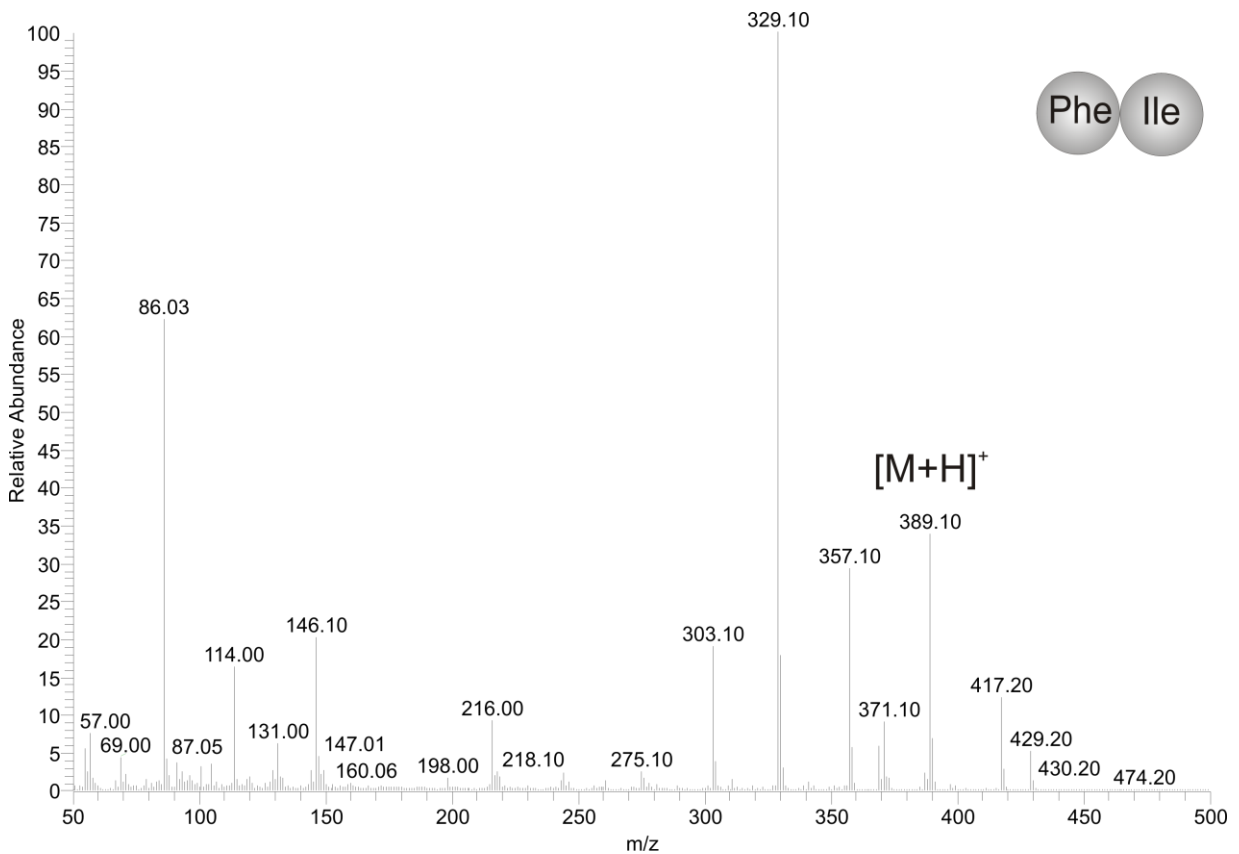

**Figure S46.** EI-MS spectra of synthetic *N*-trifluoroacetyl-Phe-Ile-methyl ester.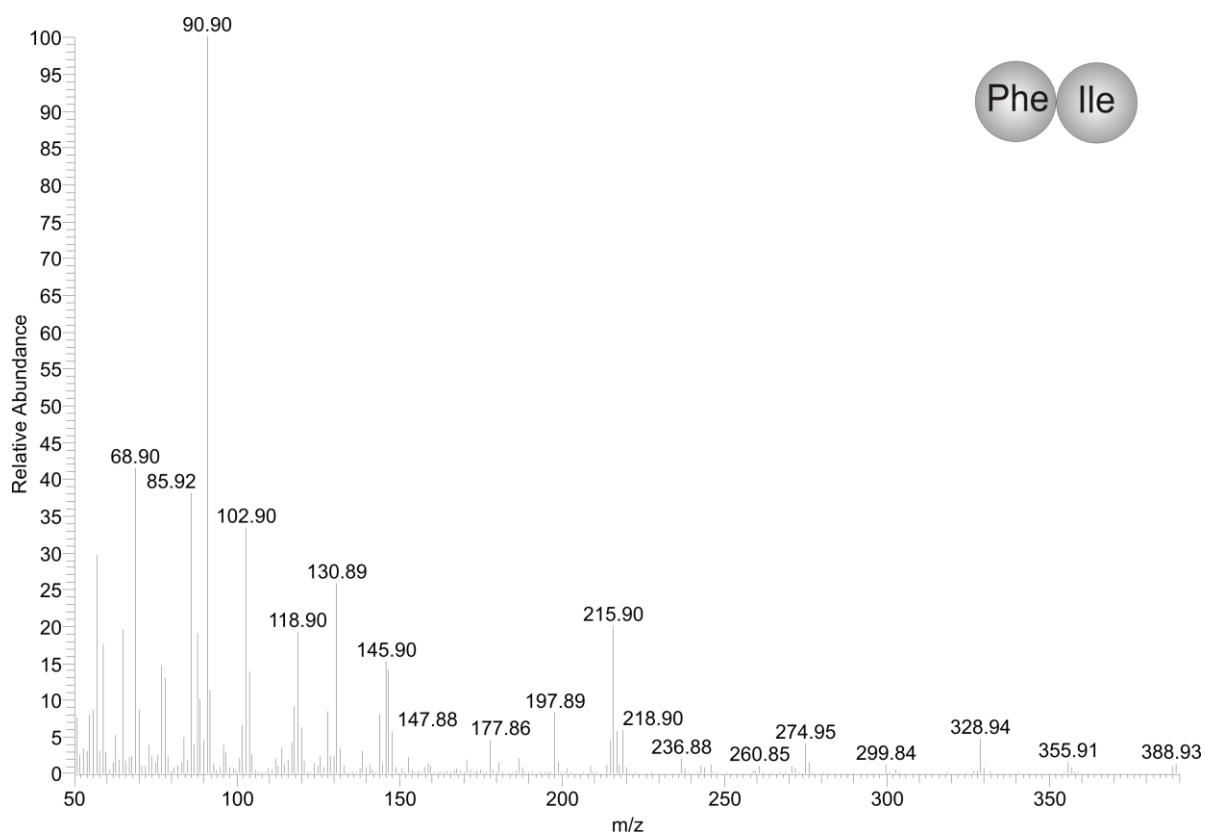

Supplement: marinedrugs-11-04834-s001.pdf [file marinedrugs-11-04834-s001.pdf]
